# Supplementary material
Source: publisher figshare collection journal article supplement (https://acs.figshare.com/ndownloader/files/4481953)
Supplement: Supplementary file 1 [file 4481953]

 
data_1 
 
_audit_creation_method            SHELXL-97 
_chemical_name_systematic 
; 
 ? 
; 
_chemical_name_common             ? 
_chemical_melting_point           ? 
_chemical_formula_moiety          ? 
_chemical_formula_sum 
 'C63 H57 N3 Na2 O19 Zn3' 
_chemical_formula_weight          1402.21 
 
loop_ 
 _atom_type_symbol 
 _atom_type_description 
 _atom_type_scat_dispersion_real 
 _atom_type_scat_dispersion_imag 
 _atom_type_scat_source 
 'C'  'C'   0.0033   0.0016 
 'International Tables Vol C Tables 4.2.6.8 and 6.1.1.4' 
 'H'  'H'   0.0000   0.0000 
 'International Tables Vol C Tables 4.2.6.8 and 6.1.1.4' 
 'N'  'N'   0.0061   0.0033 
 'International Tables Vol C Tables 4.2.6.8 and 6.1.1.4' 
 'O'  'O'   0.0106   0.0060 
 'International Tables Vol C Tables 4.2.6.8 and 6.1.1.4' 
 'Zn'  'Zn'   0.2839   1.4301 
 'International Tables Vol C Tables 4.2.6.8 and 6.1.1.4' 
 'Na'  'Na'   0.0362   0.0249 
 'International Tables Vol C Tables 4.2.6.8 and 6.1.1.4' 
 
_symmetry_cell_setting            Octhorhombic 
_symmetry_space_group_name_H-M    Pnma 
 
loop_ 
 _symmetry_equiv_pos_as_xyz 
 'x, y, z' 
 '-x+1/2, -y, z+1/2' 
 '-x, y+1/2, -z' 
 'x+1/2, -y+1/2, -z+1/2' 
 '-x, -y, -z' 
 'x-1/2, y, -z-1/2' 
 'x, -y-1/2, z' 
 '-x-1/2, y-1/2, z-1/2' 
 
_cell_length_a                    17.108(4) 
_cell_length_b                    21.644(5) 
_cell_length_c                    25.258(6) 
_cell_angle_alpha                 90.00 
_cell_angle_beta                  90.00 
_cell_angle_gamma                 90.00 
_cell_volume                      9353(4) 
_cell_formula_units_Z             4 
_cell_measurement_temperature     273(2) 
_cell_measurement_reflns_used     1032 
_cell_measurement_theta_min       3.22
_cell_measurement_theta_max       27.48
 
_exptl_crystal_description        block 
_exptl_crystal_colour             colorless
_exptl_crystal_size_max           0.20
_exptl_crystal_size_mid           0.17
_exptl_crystal_size_min           0.16
_exptl_crystal_density_meas       none
_exptl_crystal_density_diffrn     0.996 
_exptl_crystal_density_method     'not measured' 
_exptl_crystal_F_000              2880 
_exptl_absorpt_coefficient_mu     0.823 
_exptl_absorpt_correction_type    multi-scans
_exptl_absorpt_correction_T_min   0.86532
_exptl_absorpt_correction_T_max   1.00000
_exptl_absorpt_process_details    sadabs
 
_exptl_special_details 
; 
 ? 
; 
 
_diffrn_ambient_temperature       273(2) 
_diffrn_radiation_wavelength      0.71073 
_diffrn_radiation_type            MoK\a 
_diffrn_radiation_source          'fine-focus sealed tube' 
_diffrn_radiation_monochromator   graphite 
_diffrn_measurement_device_type   ? 
_diffrn_measurement_method        ? 
_diffrn_detector_area_resol_mean  ? 
_diffrn_standards_number          ? 
_diffrn_standards_interval_count  ? 
_diffrn_standards_interval_time   ? 
_diffrn_standards_decay_%         ? 
_diffrn_reflns_number             97973 
_diffrn_reflns_av_R_equivalents   0.1180 
_diffrn_reflns_av_sigmaI/netI     0.0506 
_diffrn_reflns_limit_h_min        -20 
_diffrn_reflns_limit_h_max        20 
_diffrn_reflns_limit_k_min        -25 
_diffrn_reflns_limit_k_max        25 
_diffrn_reflns_limit_l_min        -30 
_diffrn_reflns_limit_l_max        30 
_diffrn_reflns_theta_min          1.24 
_diffrn_reflns_theta_max          25.20 
_reflns_number_total              8661 
_reflns_number_gt                 6702 
_reflns_threshold_expression      >2sigma(I) 
 
_computing_data_collection        ? 
_computing_cell_refinement        ? 
_computing_data_reduction         ? 
_computing_structure_solution     'SHELXS-97 (Sheldrick, 1990)' 
_computing_structure_refinement   'SHELXL-97 (Sheldrick, 1997)' 
_computing_molecular_graphics     ? 
_computing_publication_material   ? 
 
_refine_special_details 
; 
 Refinement of F^2^ against ALL reflections.  The weighted R-factor wR and 
 goodness of fit S are based on F^2^, conventional R-factors R are based 
 on F, with F set to zero for negative F^2^. The threshold expression of 
 F^2^ > 2sigma(F^2^) is used only for calculating R-factors(gt) etc. and is 
 not relevant to the choice of reflections for refinement.  R-factors based 
 on F^2^ are statistically about twice as large as those based on F, and R- 
 factors based on ALL data will be even larger. 
; 
 
_refine_ls_structure_factor_coef  Fsqd  
_refine_ls_matrix_type            full 
_refine_ls_weighting_scheme       calc  
_refine_ls_weighting_details 
 'calc w=1/[\s^2^(Fo^2^)+(0.1647P)^2^+81.6557P] where P=(Fo^2^+2Fc^2^)/3' 
_atom_sites_solution_primary      direct 
_atom_sites_solution_secondary    difmap 
_atom_sites_solution_hydrogens    geom 
_refine_ls_hydrogen_treatment     constr 
_refine_ls_extinction_method      none 
_refine_ls_extinction_coef        ? 
_refine_ls_number_reflns          8661 
_refine_ls_number_parameters      425 
_refine_ls_number_restraints      0 
_refine_ls_R_factor_all           0.1429 
_refine_ls_R_factor_gt            0.1181 
_refine_ls_wR_factor_ref          0.3532 
_refine_ls_wR_factor_gt           0.3362 
_refine_ls_goodness_of_fit_ref    1.150 
_refine_ls_restrained_S_all       1.150 
_refine_ls_shift/su_max           0.001 
_refine_ls_shift/su_mean          0.000 
 
loop_ 
 _atom_site_label 
 _atom_site_type_symbol 
 _atom_site_fract_x 
 _atom_site_fract_y 
 _atom_site_fract_z 
 _atom_site_U_iso_or_equiv 
 _atom_site_adp_type 
 _atom_site_occupancy 
 _atom_site_symmetry_multiplicity 
 _atom_site_calc_flag 
 _atom_site_refinement_flags 
 _atom_site_disorder_assembly 
 _atom_site_disorder_group 
Zn1 Zn 0.61922(7) 1.2500 0.81365(5) 0.0244(3) Uani 1 2 d S . . 
Zn2 Zn 0.50716(5) 1.16538(5) 0.88424(4) 0.0324(3) Uani 1 1 d . . . 
Na1 Na 0.3961(9) 1.2500 0.7894(6) 0.176(6) Uani 1 2 d S . . 
Na2 Na 0.7152(5) 1.2500 0.7651(3) 0.094(2) Uani 1 2 d S . . 
C1 C 0.5014(5) 0.9705(5) 0.5945(4) 0.052(3) Uani 1 1 d . . . 
C2 C 0.5666(5) 0.9501(6) 0.5654(4) 0.062(3) Uani 1 1 d . . . 
H2 H 0.6168 0.9600 0.5768 0.075 Uiso 1 1 calc R . . 
C3 C 0.5569(5) 0.9156(6) 0.5200(4) 0.059(3) Uani 1 1 d . . . 
C4 C 0.4822(6) 0.9017(6) 0.5022(4) 0.061(3) Uani 1 1 d . . . 
H4 H 0.4760 0.8778 0.4719 0.073 Uiso 1 1 calc R . . 
C5 C 0.4172(5) 0.9227(6) 0.5286(4) 0.059(3) Uani 1 1 d . . . 
C6 C 0.4277(5) 0.9549(5) 0.5762(4) 0.050(3) Uani 1 1 d . . . 
H6 H 0.3840 0.9660 0.5959 0.060 Uiso 1 1 calc R . . 
C7 C 0.5121(5) 1.0112(5) 0.6413(4) 0.050(3) Uani 1 1 d . . . 
C8 C 0.5680(5) 1.0553(6) 0.6425(4) 0.055(3) Uani 1 1 d . . . 
H8 H 0.6019 1.0595 0.6140 0.066 Uiso 1 1 calc R . . 
C9 C 0.5755(5) 1.0940(6) 0.6849(4) 0.053(3) Uani 1 1 d . . . 
H9 H 0.6128 1.1253 0.6840 0.064 Uiso 1 1 calc R . . 
C10 C 0.5286(5) 1.0875(4) 0.7292(4) 0.042(2) Uani 1 1 d . . . 
C11 C 0.4720(5) 1.0421(5) 0.7293(4) 0.049(2) Uani 1 1 d . . . 
H11 H 0.4389 1.0377 0.7582 0.059 Uiso 1 1 calc R . . 
C12 C 0.4648(6) 1.0030(5) 0.6863(4) 0.057(3) Uani 1 1 d . . . 
H12 H 0.4284 0.9712 0.6871 0.068 Uiso 1 1 calc R . . 
C13 C 0.6273(6) 0.8928(6) 0.4908(5) 0.064(3) Uani 1 1 d . . . 
C14 C 0.6989(6) 0.8818(7) 0.5163(5) 0.076(4) Uani 1 1 d . . . 
H14 H 0.7011 0.8858 0.5529 0.091 Uiso 1 1 calc R . . 
C15 C 0.7658(6) 0.8653(6) 0.4897(4) 0.064(3) Uani 1 1 d . . . 
H15 H 0.8127 0.8601 0.5077 0.077 Uiso 1 1 calc R . . 
C16 C 0.7619(6) 0.8565(5) 0.4343(4) 0.051(3) Uani 1 1 d . . . 
C17 C 0.6927(6) 0.8673(5) 0.4088(4) 0.056(3) Uani 1 1 d . . . 
H17 H 0.6904 0.8620 0.3723 0.067 Uiso 1 1 calc R . . 
C18 C 0.6262(6) 0.8856(6) 0.4355(5) 0.061(3) Uani 1 1 d . . . 
H18 H 0.5804 0.8933 0.4168 0.074 Uiso 1 1 calc R . . 
C19 C 0.3366(6) 0.9117(6) 0.5066(4) 0.062(3) Uani 1 1 d . . . 
C20 C 0.3150(6) 0.8588(5) 0.4819(4) 0.058(3) Uani 1 1 d . . . 
H20 H 0.3505 0.8264 0.4795 0.070 Uiso 1 1 calc R . . 
C21 C 0.2393(5) 0.8517(5) 0.4595(4) 0.052(3) Uani 1 1 d . . . 
H21 H 0.2265 0.8156 0.4416 0.062 Uiso 1 1 calc R . . 
C22 C 0.1861(6) 0.8972(6) 0.4642(5) 0.064(3) Uani 1 1 d . . . 
C23 C 0.2058(6) 0.9530(7) 0.4883(6) 0.078(4) Uani 1 1 d . . . 
H23 H 0.1706 0.9858 0.4892 0.094 Uiso 1 1 calc R . . 
C24 C 0.2803(6) 0.9583(7) 0.5109(5) 0.077(4) Uani 1 1 d . . . 
H24 H 0.2928 0.9941 0.5294 0.092 Uiso 1 1 calc R . . 
C25 C 0.5373(5) 1.1314(4) 0.7754(3) 0.038(2) Uani 1 1 d . . . 
C26 C 0.8346(5) 0.8383(5) 0.4054(4) 0.045(2) Uani 1 1 d . . . 
C27 C 0.1046(6) 0.8893(7) 0.4390(5) 0.067(3) Uani 1 1 d . . . 
C28 C 0.3092(15) 1.1201(18) 0.791(2) 0.33(4) Uani 1 1 d . . . 
H28 H 0.3520 1.1211 0.8141 0.393 Uiso 1 1 calc R . . 
C29 C 0.287(2) 1.003(2) 0.822(2) 0.35(4) Uani 1 1 d . . . 
H29A H 0.3144 0.9692 0.8061 0.529 Uiso 1 1 calc R . . 
H29B H 0.2366 0.9888 0.8343 0.529 Uiso 1 1 calc R . . 
H29C H 0.3163 1.0183 0.8517 0.529 Uiso 1 1 calc R . . 
C30 C 0.2407(15) 1.034(3) 0.7354(17) 0.37(4) Uani 1 1 d . . . 
H30A H 0.2163 1.0678 0.7173 0.557 Uiso 1 1 calc R . . 
H30B H 0.2020 1.0034 0.7440 0.557 Uiso 1 1 calc R . . 
H30C H 0.2798 1.0159 0.7129 0.557 Uiso 1 1 calc R . . 
C31 C 0.4853(15) 0.2500 0.5689(8) 0.082(6) Uani 1 2 d S . . 
H31 H 0.4320 0.2500 0.5614 0.099 Uiso 1 2 calc SR . . 
C32 C 0.5930(14) 0.2500 0.6318(13) 0.135(11) Uani 1 2 d S . . 
H32A H 0.6115 0.2082 0.6338 0.202 Uiso 0.50 1 calc PR . . 
H32B H 0.6038 0.2709 0.6645 0.202 Uiso 0.50 1 calc PR . . 
H32C H 0.6192 0.2710 0.6033 0.202 Uiso 0.50 1 calc PR . . 
C33 C 0.4517(18) 0.2500 0.6626(12) 0.134(10) Uani 1 2 d S . . 
H33A H 0.4589 0.2154 0.6859 0.200 Uiso 0.50 1 calc PR . . 
H33B H 0.4016 0.2469 0.6457 0.200 Uiso 0.50 1 calc PR . . 
H33C H 0.4542 0.2877 0.6826 0.200 Uiso 0.50 1 calc PR . . 
N1 N 0.2754(10) 1.0550(9) 0.7814(10) 0.142(7) Uani 1 1 d . . . 
N2 N 0.5130(14) 0.2500 0.6225(7) 0.101(6) Uani 1 2 d S . . 
O1 O 0.5054(4) 1.1157(3) 0.8190(3) 0.0471(16) Uani 1 1 d . . . 
O2 O 0.5737(4) 1.1808(3) 0.7666(2) 0.0457(16) Uani 1 1 d . . . 
O3 O 0.0588(6) 0.9343(5) 0.4402(6) 0.127(5) Uani 1 1 d . . . 
O4 O 0.0922(4) 0.8405(4) 0.4190(3) 0.061(2) Uani 1 1 d . . . 
O5 O 0.8246(4) 0.8173(4) 0.3597(3) 0.0557(19) Uani 1 1 d . . . 
O6 O 0.8991(4) 0.8459(3) 0.4280(2) 0.0484(16) Uani 1 1 d . . . 
O7 O 0.5147(4) 1.2500 0.8559(3) 0.0252(16) Uani 1 2 d S . . 
O10 O 0.291(2) 1.166(3) 0.776(3) 0.65(5) Uani 1 1 d . . . 
O11 O 0.5340(10) 0.2500 0.5329(5) 0.090(4) Uani 1 2 d S . . 
O1W O 0.359(5) 0.051(3) 0.1355(15) 1.00(11) Uani 1 1 d . . . 
H1WA H 0.3408 0.0832 0.1233 1.200 Uiso 1 1 d R . . 
H1WB H 0.4051 0.0471 0.1269 1.200 Uiso 1 1 d R . . 
O2W O 0.987(2) 0.2500 0.425(3) 0.47(5) Uani 1 2 d S . . 
H2WA H 1.0343 0.2500 0.4294 0.561 Uiso 1 2 d SR . . 
H2WB H 0.9634 0.2500 0.4530 0.561 Uiso 1 2 d SR . . 
 
loop_ 
 _atom_site_aniso_label 
 _atom_site_aniso_U_11 
 _atom_site_aniso_U_22 
 _atom_site_aniso_U_33 
 _atom_site_aniso_U_23 
 _atom_site_aniso_U_13 
 _atom_site_aniso_U_12 
Zn1 0.0156(6) 0.0378(7) 0.0197(6) 0.000 -0.0013(4) 0.000 
Zn2 0.0271(5) 0.0409(6) 0.0292(5) 0.0018(4) 0.0024(4) -0.0037(4) 
Na1 0.149(12) 0.252(18) 0.127(10) 0.000 -0.005(9) 0.000 
Na2 0.071(5) 0.124(7) 0.088(5) 0.000 0.015(4) 0.000 
C1 0.026(4) 0.072(7) 0.057(6) -0.036(5) -0.003(4) 0.006(4) 
C2 0.021(4) 0.101(9) 0.065(7) -0.044(6) -0.002(4) 0.004(5) 
C3 0.029(5) 0.091(8) 0.058(6) -0.041(6) -0.005(4) 0.011(5) 
C4 0.036(5) 0.086(8) 0.060(6) -0.046(6) -0.005(5) 0.001(5) 
C5 0.030(5) 0.082(8) 0.065(7) -0.045(6) 0.001(4) -0.008(5) 
C6 0.019(4) 0.066(6) 0.065(6) -0.039(5) -0.001(4) -0.001(4) 
C7 0.015(4) 0.080(7) 0.056(6) -0.040(5) 0.001(4) 0.003(4) 
C8 0.020(4) 0.094(8) 0.051(6) -0.039(6) 0.007(4) -0.009(5) 
C9 0.020(4) 0.088(8) 0.051(5) -0.030(5) 0.005(4) -0.014(5) 
C10 0.028(4) 0.052(5) 0.045(5) -0.022(4) -0.001(4) -0.003(4) 
C11 0.034(5) 0.065(6) 0.048(5) -0.023(5) 0.008(4) -0.004(5) 
C12 0.033(5) 0.068(7) 0.068(7) -0.038(6) -0.001(5) -0.010(5) 
C13 0.033(5) 0.091(8) 0.067(7) -0.047(7) -0.006(5) 0.014(5) 
C14 0.045(6) 0.129(11) 0.054(6) -0.053(7) -0.010(5) 0.022(7) 
C15 0.038(5) 0.111(10) 0.044(5) -0.024(6) -0.004(4) 0.030(6) 
C16 0.039(5) 0.070(7) 0.043(5) -0.020(5) 0.003(4) 0.017(5) 
C17 0.038(5) 0.080(7) 0.050(6) -0.031(5) -0.008(4) 0.020(5) 
C18 0.035(5) 0.081(8) 0.068(7) -0.040(6) -0.011(5) 0.017(5) 
C19 0.042(6) 0.088(8) 0.054(6) -0.037(6) -0.003(5) -0.023(6) 
C20 0.040(5) 0.068(7) 0.067(7) -0.019(6) -0.004(5) 0.007(5) 
C21 0.037(5) 0.060(6) 0.057(6) -0.030(5) 0.001(4) -0.010(5) 
C22 0.043(6) 0.083(8) 0.066(7) -0.032(6) 0.000(5) -0.004(6) 
C23 0.037(6) 0.096(10) 0.103(10) -0.033(8) -0.017(6) 0.001(6) 
C24 0.029(5) 0.110(10) 0.092(9) -0.052(8) -0.004(5) -0.008(6) 
C25 0.023(4) 0.057(6) 0.034(4) -0.011(4) 0.003(3) -0.002(4) 
C26 0.029(5) 0.063(6) 0.044(5) -0.005(5) 0.000(4) 0.012(4) 
C27 0.039(6) 0.093(9) 0.069(7) -0.023(7) -0.008(5) -0.004(6) 
C28 0.091(16) 0.29(4) 0.61(8) -0.33(5) -0.14(3) 0.06(2) 
C29 0.18(4) 0.30(5) 0.58(9) 0.21(6) 0.14(5) 0.03(4) 
C30 0.092(18) 0.69(10) 0.33(5) -0.28(6) -0.10(3) 0.09(4) 
C31 0.125(18) 0.059(11) 0.063(12) 0.000 0.014(12) 0.000 
C32 0.069(16) 0.16(3) 0.18(3) 0.000 0.043(17) 0.000 
C33 0.12(2) 0.15(3) 0.14(2) 0.000 0.01(2) 0.000 
N1 0.093(11) 0.127(14) 0.20(2) -0.027(14) 0.013(13) 0.014(11) 
N2 0.125(17) 0.111(15) 0.067(11) 0.000 0.008(11) 0.000 
O1 0.047(4) 0.053(4) 0.042(4) -0.013(3) 0.006(3) -0.013(3) 
O2 0.044(4) 0.064(4) 0.029(3) -0.019(3) 0.006(3) -0.013(3) 
O3 0.061(6) 0.099(8) 0.220(14) -0.045(9) -0.056(8) 0.021(6) 
O4 0.034(4) 0.085(6) 0.063(5) -0.007(4) -0.021(3) -0.010(4) 
O5 0.039(4) 0.088(5) 0.040(4) -0.023(4) -0.008(3) 0.031(4) 
O6 0.036(3) 0.072(5) 0.037(3) -0.012(3) 0.004(3) 0.007(3) 
O7 0.012(3) 0.031(4) 0.032(4) 0.000 -0.001(3) 0.000 
O10 0.31(4) 0.74(9) 0.89(11) 0.50(8) -0.35(6) 0.02(5) 
O11 0.122(12) 0.086(9) 0.063(8) 0.000 -0.001(8) 0.000 
O1W 1.7(2) 1.03(14) 0.32(5) 0.36(7) -0.50(9) -1.00(17) 
O2W 0.27(5) 0.29(5) 0.84(14) 0.000 0.33(7) 0.000 
 
_geom_special_details 
; 
 All esds (except the esd in the dihedral angle between two l.s. planes) 
 are estimated using the full covariance matrix.  The cell esds are taken 
 into account individually in the estimation of esds in distances, angles 
 and torsion angles; correlations between esds in cell parameters are only 
 used when they are defined by crystal symmetry.  An approximate (isotropic) 
 treatment of cell esds is used for estimating esds involving l.s. planes. 
; 
 
loop_ 
 _geom_bond_atom_site_label_1 
 _geom_bond_atom_site_label_2 
 _geom_bond_distance 
 _geom_bond_site_symmetry_2 
 _geom_bond_publ_flag 
Zn1 Na2 2.049(8) . ? 
Zn1 O2 2.065(6) 7_585 ? 
Zn1 O2 2.065(6) . ? 
Zn1 O7 2.082(7) . ? 
Zn1 O5 2.097(6) 8_766 ? 
Zn1 O5 2.097(6) 2_675 ? 
Zn2 O4 1.918(6) 2_575 ? 
Zn2 O6 1.962(6) 2_675 ? 
Zn2 O1 1.968(6) . ? 
Zn2 O7 1.971(3) . ? 
Zn2 Na1 3.564(13) . ? 
Na1 O10 2.58(5) 7_585 ? 
Na1 O10 2.58(5) . ? 
Na1 O7 2.633(16) . ? 
Na1 Na2 3.388(17) 6_557 ? 
Na1 Zn2 3.564(13) 7_585 ? 
Na2 O10 2.46(3) 4_576 ? 
Na2 O10 2.46(3) 6_657 ? 
Na2 O2 2.847(9) 7_585 ? 
Na2 O2 2.847(9) . ? 
Na2 O5 2.880(10) 8_766 ? 
Na2 O5 2.880(10) 2_675 ? 
Na2 Na1 3.388(17) 6_657 ? 
C1 C6 1.387(12) . ? 
C1 C2 1.408(13) . ? 
C1 C7 1.485(13) . ? 
C2 C3 1.378(13) . ? 
C3 C4 1.388(13) . ? 
C3 C13 1.497(13) . ? 
C4 C5 1.374(13) . ? 
C5 C6 1.400(13) . ? 
C5 C19 1.505(13) . ? 
C7 C8 1.352(14) . ? 
C7 C12 1.405(15) . ? 
C8 C9 1.365(13) . ? 
C9 C10 1.385(13) . ? 
C10 C11 1.379(13) . ? 
C10 C25 1.512(11) . ? 
C11 C12 1.381(13) . ? 
C13 C14 1.403(15) . ? 
C13 C18 1.406(15) . ? 
C14 C15 1.374(14) . ? 
C15 C16 1.412(14) . ? 
C16 C17 1.367(13) . ? 
C16 C26 1.495(12) . ? 
C17 C18 1.381(13) . ? 
C19 C20 1.356(15) . ? 
C19 C24 1.399(17) . ? 
C20 C21 1.421(14) . ? 
C21 C22 1.347(15) . ? 
C22 C23 1.394(17) . ? 
C22 C27 1.542(14) . ? 
C23 C24 1.401(15) . ? 
C25 O2 1.257(11) . ? 
C25 O1 1.276(10) . ? 
C26 O6 1.253(11) . ? 
C26 O5 1.253(11) . ? 
C27 O4 1.189(14) . ? 
C27 O3 1.250(16) . ? 
C28 O10 1.11(6) . ? 
C28 N1 1.54(4) . ? 
C29 N1 1.54(4) . ? 
C30 N1 1.38(3) . ? 
C31 O11 1.23(2) . ? 
C31 N2 1.44(3) . ? 
C32 N2 1.39(3) . ? 
C33 N2 1.46(3) . ? 
O4 Zn2 1.918(6) 2_574 ? 
O5 Zn1 2.097(6) 2_674 ? 
O5 Na2 2.880(10) 2_674 ? 
O6 Zn2 1.962(6) 2_674 ? 
O7 Zn2 1.971(3) 7_585 ? 
O10 Na2 2.46(3) 6_557 ? 
 
loop_ 
 _geom_angle_atom_site_label_1 
 _geom_angle_atom_site_label_2 
 _geom_angle_atom_site_label_3 
 _geom_angle 
 _geom_angle_site_symmetry_1 
 _geom_angle_site_symmetry_3 
 _geom_angle_publ_flag 
Na2 Zn1 O2 87.6(2) . 7_585 ? 
Na2 Zn1 O2 87.6(2) . . ? 
O2 Zn1 O2 93.0(4) 7_585 . ? 
Na2 Zn1 O7 174.1(3) . . ? 
O2 Zn1 O7 88.3(2) 7_585 . ? 
O2 Zn1 O7 88.3(2) . . ? 
Na2 Zn1 O5 88.0(3) . 8_766 ? 
O2 Zn1 O5 89.3(3) 7_585 8_766 ? 
O2 Zn1 O5 174.9(3) . 8_766 ? 
O7 Zn1 O5 96.3(2) . 8_766 ? 
Na2 Zn1 O5 88.0(3) . 2_675 ? 
O2 Zn1 O5 174.9(3) 7_585 2_675 ? 
O2 Zn1 O5 89.3(3) . 2_675 ? 
O7 Zn1 O5 96.3(2) . 2_675 ? 
O5 Zn1 O5 88.0(5) 8_766 2_675 ? 
O4 Zn2 O6 117.3(3) 2_575 2_675 ? 
O4 Zn2 O1 109.5(3) 2_575 . ? 
O6 Zn2 O1 114.6(3) 2_675 . ? 
O4 Zn2 O7 106.7(3) 2_575 . ? 
O6 Zn2 O7 105.4(3) 2_675 . ? 
O1 Zn2 O7 101.8(3) . . ? 
O4 Zn2 Na1 82.5(3) 2_575 . ? 
O6 Zn2 Na1 151.3(3) 2_675 . ? 
O1 Zn2 Na1 73.1(3) . . ? 
O7 Zn2 Na1 46.6(2) . . ? 
O10 Na1 O10 89.7(19) 7_585 . ? 
O10 Na1 O7 128.4(7) 7_585 . ? 
O10 Na1 O7 128.4(7) . . ? 
O10 Na1 Na2 46.4(7) 7_585 6_557 ? 
O10 Na1 Na2 46.4(7) . 6_557 ? 
O7 Na1 Na2 164.4(6) . 6_557 ? 
O10 Na1 Zn2 95.6(6) 7_585 7_585 ? 
O10 Na1 Zn2 145.3(15) . 7_585 ? 
O7 Na1 Zn2 32.95(14) . 7_585 ? 
Na2 Na1 Zn2 139.5(3) 6_557 7_585 ? 
O10 Na1 Zn2 145.3(15) 7_585 . ? 
O10 Na1 Zn2 95.6(6) . . ? 
O7 Na1 Zn2 32.95(14) . . ? 
Na2 Na1 Zn2 139.5(3) 6_557 . ? 
Zn2 Na1 Zn2 61.9(2) 7_585 . ? 
Zn1 Na2 O10 132.3(13) . 4_576 ? 
Zn1 Na2 O10 132.3(13) . 6_657 ? 
O10 Na2 O10 95(3) 4_576 6_657 ? 
Zn1 Na2 O2 46.44(18) . 7_585 ? 
O10 Na2 O2 93.7(12) 4_576 7_585 ? 
O10 Na2 O2 147.4(15) 6_657 7_585 ? 
Zn1 Na2 O2 46.44(18) . . ? 
O10 Na2 O2 147.4(15) 4_576 . ? 
O10 Na2 O2 93.7(12) 6_657 . ? 
O2 Na2 O2 63.5(3) 7_585 . ? 
Zn1 Na2 O5 46.70(19) . 8_766 ? 
O10 Na2 O5 95.7(16) 4_576 8_766 ? 
O10 Na2 O5 147.9(18) 6_657 8_766 ? 
O2 Na2 O5 61.4(2) 7_585 8_766 ? 
O2 Na2 O5 93.1(3) . 8_766 ? 
Zn1 Na2 O5 46.70(19) . 2_675 ? 
O10 Na2 O5 147.9(18) 4_576 2_675 ? 
O10 Na2 O5 95.7(16) 6_657 2_675 ? 
O2 Na2 O5 93.1(3) 7_585 2_675 ? 
O2 Na2 O5 61.4(2) . 2_675 ? 
O5 Na2 O5 60.8(4) 8_766 2_675 ? 
Zn1 Na2 Na1 167.2(5) . 6_657 ? 
O10 Na2 Na1 49.3(12) 4_576 6_657 ? 
O10 Na2 Na1 49.3(12) 6_657 6_657 ? 
O2 Na2 Na1 141.5(3) 7_585 6_657 ? 
O2 Na2 Na1 141.5(3) . 6_657 ? 
O5 Na2 Na1 123.6(3) 8_766 6_657 ? 
O5 Na2 Na1 123.6(3) 2_675 6_657 ? 
C6 C1 C2 118.0(8) . . ? 
C6 C1 C7 121.5(8) . . ? 
C2 C1 C7 120.3(8) . . ? 
C3 C2 C1 120.6(9) . . ? 
C2 C3 C4 119.9(9) . . ? 
C2 C3 C13 119.4(8) . . ? 
C4 C3 C13 120.7(9) . . ? 
C5 C4 C3 121.1(9) . . ? 
C4 C5 C6 118.6(8) . . ? 
C4 C5 C19 120.6(8) . . ? 
C6 C5 C19 120.8(8) . . ? 
C1 C6 C5 121.7(8) . . ? 
C8 C7 C12 118.5(8) . . ? 
C8 C7 C1 121.6(9) . . ? 
C12 C7 C1 119.8(9) . . ? 
C7 C8 C9 121.2(9) . . ? 
C8 C9 C10 121.0(9) . . ? 
C11 C10 C9 118.7(8) . . ? 
C11 C10 C25 121.1(8) . . ? 
C9 C10 C25 120.1(8) . . ? 
C10 C11 C12 119.9(9) . . ? 
C11 C12 C7 120.4(9) . . ? 
C14 C13 C18 116.7(9) . . ? 
C14 C13 C3 122.2(9) . . ? 
C18 C13 C3 121.0(9) . . ? 
C15 C14 C13 123.1(10) . . ? 
C14 C15 C16 118.7(9) . . ? 
C17 C16 C15 119.0(9) . . ? 
C17 C16 C26 122.3(9) . . ? 
C15 C16 C26 118.7(9) . . ? 
C16 C17 C18 122.2(9) . . ? 
C17 C18 C13 120.3(9) . . ? 
C20 C19 C24 117.1(10) . . ? 
C20 C19 C5 123.6(11) . . ? 
C24 C19 C5 119.3(9) . . ? 
C19 C20 C21 121.6(10) . . ? 
C22 C21 C20 120.1(9) . . ? 
C21 C22 C23 120.6(10) . . ? 
C21 C22 C27 119.6(10) . . ? 
C23 C22 C27 119.7(11) . . ? 
C22 C23 C24 117.9(12) . . ? 
C19 C24 C23 122.4(11) . . ? 
O2 C25 O1 126.3(8) . . ? 
O2 C25 C10 116.6(7) . . ? 
O1 C25 C10 117.1(8) . . ? 
O6 C26 O5 125.9(8) . . ? 
O6 C26 C16 118.5(8) . . ? 
O5 C26 C16 115.6(8) . . ? 
O4 C27 O3 126.1(11) . . ? 
O4 C27 C22 115.8(11) . . ? 
O3 C27 C22 118.0(11) . . ? 
O10 C28 N1 131(4) . . ? 
O11 C31 N2 118(2) . . ? 
C30 N1 C29 112(3) . . ? 
C30 N1 C28 127(4) . . ? 
C29 N1 C28 121(3) . . ? 
C32 N2 C31 119(2) . . ? 
C32 N2 C33 126(2) . . ? 
C31 N2 C33 115(2) . . ? 
C25 O1 Zn2 124.8(6) . . ? 
C25 O2 Zn1 134.6(5) . . ? 
C25 O2 Na2 150.5(6) . . ? 
Zn1 O2 Na2 45.98(19) . . ? 
C27 O4 Zn2 114.3(8) . 2_574 ? 
C26 O5 Zn1 134.5(6) . 2_674 ? 
C26 O5 Na2 168.7(7) . 2_674 ? 
Zn1 O5 Na2 45.32(19) 2_674 2_674 ? 
C26 O6 Zn2 116.6(6) . 2_674 ? 
Zn2 O7 Zn2 136.7(4) 7_585 . ? 
Zn2 O7 Zn1 104.0(2) 7_585 . ? 
Zn2 O7 Zn1 104.0(2) . . ? 
Zn2 O7 Na1 100.4(2) 7_585 . ? 
Zn2 O7 Na1 100.4(2) . . ? 
Zn1 O7 Na1 109.6(4) . . ? 
C28 O10 Na2 163(4) . 6_557 ? 
C28 O10 Na1 113(3) . . ? 
Na2 O10 Na1 84.3(16) 6_557 . ? 
 
_diffrn_measured_fraction_theta_max    1.000 
_diffrn_reflns_theta_full              25.20 
_diffrn_measured_fraction_theta_full   1.000 
_refine_diff_density_max    1.753 
_refine_diff_density_min   -1.590 
_refine_diff_density_rms    0.270 

 
data_2 
 
_audit_creation_method            SHELXL-97 
_chemical_name_systematic 
; 
 ? 
; 
_chemical_name_common             ? 
_chemical_melting_point           ? 
_chemical_formula_moiety          ? 
_chemical_formula_sum 
 'C73 H84 K3 N6 O22 Zn2' 
_chemical_formula_weight          1645.50 
 
loop_ 
 _atom_type_symbol 
 _atom_type_description 
 _atom_type_scat_dispersion_real 
 _atom_type_scat_dispersion_imag 
 _atom_type_scat_source 
 'C'  'C'   0.0033   0.0016 
 'International Tables Vol C Tables 4.2.6.8 and 6.1.1.4' 
 'H'  'H'   0.0000   0.0000 
 'International Tables Vol C Tables 4.2.6.8 and 6.1.1.4' 
 'N'  'N'   0.0061   0.0033 
 'International Tables Vol C Tables 4.2.6.8 and 6.1.1.4' 
 'O'  'O'   0.0106   0.0060 
 'International Tables Vol C Tables 4.2.6.8 and 6.1.1.4' 
 'Zn'  'Zn'   0.2839   1.4301 
 'International Tables Vol C Tables 4.2.6.8 and 6.1.1.4' 
 'K'  'K'   0.2009   0.2494 
 'International Tables Vol C Tables 4.2.6.8 and 6.1.1.4' 
 
_symmetry_cell_setting            Triclinic 
_symmetry_space_group_name_H-M    P-1
 
loop_ 
 _symmetry_equiv_pos_as_xyz 
 'x, y, z' 
 '-x, -y, -z' 
 
_cell_length_a                    16.3656(18) 
_cell_length_b                    17.979(2) 
_cell_length_c                    19.232(2) 
_cell_angle_alpha                 65.452(2) 
_cell_angle_beta                  66.275(2) 
_cell_angle_gamma                 69.154(2) 
_cell_volume                      4589.5(9) 
_cell_formula_units_Z             2 
_cell_measurement_temperature     293(2) 
_cell_measurement_reflns_used     1045 
_cell_measurement_theta_min       3.20
_cell_measurement_theta_max       27.46
 
_exptl_crystal_description        block 
_exptl_crystal_colour             colorless
_exptl_crystal_size_max           0.22
_exptl_crystal_size_mid           0.20 
_exptl_crystal_size_min           0.20
_exptl_crystal_density_meas       none
_exptl_crystal_density_diffrn     1.191 
_exptl_crystal_density_method     'not measured' 
_exptl_crystal_F_000              1714 
_exptl_absorpt_coefficient_mu     0.723 
_exptl_absorpt_correction_type    multi-scan
_exptl_absorpt_correction_T_min   0.85632
_exptl_absorpt_correction_T_max   1.00000
_exptl_absorpt_process_details    sadabs
 
_exptl_special_details 
; 
 ? 
; 
 
_diffrn_ambient_temperature       293(2) 
_diffrn_radiation_wavelength      0.71073 
_diffrn_radiation_type            MoK\a 
_diffrn_radiation_source          'fine-focus sealed tube' 
_diffrn_radiation_monochromator   graphite 
_diffrn_measurement_device_type   ? 
_diffrn_measurement_method        ? 
_diffrn_detector_area_resol_mean  ? 
_diffrn_standards_number          ? 
_diffrn_standards_interval_count  ? 
_diffrn_standards_interval_time   ? 
_diffrn_standards_decay_%         ? 
_diffrn_reflns_number             49756 
_diffrn_reflns_av_R_equivalents   0.0583 
_diffrn_reflns_av_sigmaI/netI     0.0682 
_diffrn_reflns_limit_h_min        -19 
_diffrn_reflns_limit_h_max        19 
_diffrn_reflns_limit_k_min        -21 
_diffrn_reflns_limit_k_max        21 
_diffrn_reflns_limit_l_min        -23 
_diffrn_reflns_limit_l_max        23 
_diffrn_reflns_theta_min          1.28 
_diffrn_reflns_theta_max          25.20 
_reflns_number_total              16523 
_reflns_number_gt                 10896 
_reflns_threshold_expression      >2sigma(I) 
 
_computing_data_collection        ? 
_computing_cell_refinement        ? 
_computing_data_reduction         ? 
_computing_structure_solution     'SHELXS-97 (Sheldrick, 1990)' 
_computing_structure_refinement   'SHELXL-97 (Sheldrick, 1997)' 
_computing_molecular_graphics     ? 
_computing_publication_material   ? 
 
_refine_special_details 
; 
 Refinement of F^2^ against ALL reflections.  The weighted R-factor wR and 
 goodness of fit S are based on F^2^, conventional R-factors R are based 
 on F, with F set to zero for negative F^2^. The threshold expression of 
 F^2^ > 2sigma(F^2^) is used only for calculating R-factors(gt) etc. and is 
 not relevant to the choice of reflections for refinement.  R-factors based 
 on F^2^ are statistically about twice as large as those based on F, and R- 
 factors based on ALL data will be even larger. 
; 
 
_refine_ls_structure_factor_coef  Fsqd  
_refine_ls_matrix_type            full 
_refine_ls_weighting_scheme       calc  
_refine_ls_weighting_details 
 'calc w=1/[\s^2^(Fo^2^)+(0.1883P)^2^+16.7878P] where P=(Fo^2^+2Fc^2^)/3' 
_atom_sites_solution_primary      direct 
_atom_sites_solution_secondary    difmap 
_atom_sites_solution_hydrogens    geom 
_refine_ls_hydrogen_treatment     constr 
_refine_ls_extinction_method      none 
_refine_ls_extinction_coef        ? 
_refine_ls_number_reflns          16523 
_refine_ls_number_parameters      858 
_refine_ls_number_restraints      21 
_refine_ls_R_factor_all           0.1390 
_refine_ls_R_factor_gt            0.0995 
_refine_ls_wR_factor_ref          0.3300 
_refine_ls_wR_factor_gt           0.2930 
_refine_ls_goodness_of_fit_ref    1.068 
_refine_ls_restrained_S_all       1.069 
_refine_ls_shift/su_max           0.001 
_refine_ls_shift/su_mean          0.000 
 
loop_ 
 _atom_site_label 
 _atom_site_type_symbol 
 _atom_site_fract_x 
 _atom_site_fract_y 
 _atom_site_fract_z 
 _atom_site_U_iso_or_equiv 
 _atom_site_adp_type 
 _atom_site_occupancy 
 _atom_site_symmetry_multiplicity 
 _atom_site_calc_flag 
 _atom_site_refinement_flags 
 _atom_site_disorder_assembly 
 _atom_site_disorder_group 
Zn1 Zn 1.61534(5) 0.20141(6) -0.03469(5) 0.0356(3) Uani 1 1 d . . . 
Zn2 Zn 0.64495(5) 0.96427(5) 0.22754(5) 0.0360(3) Uani 1 1 d . . . 
K1 K 1.82123(10) 0.05261(10) 0.03302(10) 0.0403(4) Uani 1 1 d . . . 
K2 K 1.60370(11) 0.19414(11) 0.16970(10) 0.0418(4) Uani 1 1 d . . . 
K3 K 1.9979(9) -0.0634(7) -0.0456(7) 0.348(7) Uani 1 1 d . . . 
C1 C 1.0506(4) 0.3950(4) 0.1047(4) 0.0349(16) Uani 1 1 d . . . 
C2 C 1.0120(4) 0.4673(5) 0.1263(4) 0.0363(16) Uani 1 1 d . . . 
H2 H 1.0469 0.4876 0.1394 0.044 Uiso 1 1 calc R . . 
C3 C 0.9220(4) 0.5102(4) 0.1288(4) 0.0331(15) Uani 1 1 d . . . 
C4 C 0.8699(4) 0.4778(4) 0.1096(4) 0.0339(16) Uani 1 1 d . . . 
H4 H 0.8094 0.5056 0.1116 0.041 Uiso 1 1 calc R . . 
C5 C 0.9072(4) 0.4049(4) 0.0878(4) 0.0328(15) Uani 1 1 d . . . 
C6 C 0.9981(4) 0.3632(4) 0.0860(4) 0.0352(16) Uani 1 1 d . . . 
H6 H 1.0237 0.3141 0.0723 0.042 Uiso 1 1 calc R . . 
C7 C 1.1502(4) 0.3557(5) 0.0940(5) 0.0357(16) Uani 1 1 d . . . 
C8 C 1.1935(5) 0.3509(5) 0.1457(5) 0.046(2) Uani 1 1 d . . . 
H8 H 1.1594 0.3681 0.1907 0.055 Uiso 1 1 calc R . . 
C9 C 1.2890(5) 0.3199(6) 0.1297(5) 0.050(2) Uani 1 1 d . . . 
H9 H 1.3172 0.3145 0.1655 0.060 Uiso 1 1 calc R . . 
C10 C 1.3410(4) 0.2976(5) 0.0620(4) 0.0362(16) Uani 1 1 d . . . 
C11 C 1.2976(4) 0.3011(4) 0.0102(4) 0.0337(15) Uani 1 1 d . . . 
H11 H 1.3324 0.2846 -0.0350 0.040 Uiso 1 1 calc R . . 
C12 C 1.2036(4) 0.3290(4) 0.0263(4) 0.0336(15) Uani 1 1 d . . . 
H12 H 1.1753 0.3302 -0.0077 0.040 Uiso 1 1 calc R . . 
C13 C 0.8819(4) 0.5923(4) 0.1434(4) 0.0340(15) Uani 1 1 d . . . 
C14 C 0.7903(4) 0.6150(5) 0.1855(5) 0.0364(16) Uani 1 1 d . . . 
H14 H 0.7533 0.5768 0.2081 0.044 Uiso 1 1 calc R . . 
C15 C 0.7533(4) 0.6946(5) 0.1943(5) 0.0378(17) Uani 1 1 d . . . 
H15 H 0.6918 0.7088 0.2225 0.045 Uiso 1 1 calc R . . 
C16 C 0.8064(5) 0.7526(5) 0.1619(4) 0.0359(16) Uani 1 1 d . . . 
C17 C 0.8984(5) 0.7301(5) 0.1196(5) 0.0385(17) Uani 1 1 d . . . 
H17 H 0.9347 0.7691 0.0959 0.046 Uiso 1 1 calc R . . 
C18 C 0.9364(4) 0.6503(5) 0.1125(5) 0.0383(17) Uani 1 1 d . . . 
H18 H 0.9987 0.6352 0.0869 0.046 Uiso 1 1 calc R . . 
C19 C 0.8537(4) 0.3751(4) 0.0620(4) 0.0324(15) Uani 1 1 d . . . 
C20 C 0.8625(5) 0.2897(5) 0.0791(5) 0.0370(16) Uani 1 1 d . . . 
H20 H 0.9019 0.2503 0.1081 0.044 Uiso 1 1 calc R . . 
C21 C 0.8136(4) 0.2632(5) 0.0537(5) 0.0376(16) Uani 1 1 d . . . 
H21 H 0.8182 0.2061 0.0676 0.045 Uiso 1 1 calc R . . 
C22 C 0.7565(4) 0.3219(5) 0.0066(4) 0.0359(16) Uani 1 1 d . . . 
C23 C 0.7490(5) 0.4062(5) -0.0116(5) 0.0376(16) Uani 1 1 d . . . 
H23 H 0.7123 0.4456 -0.0432 0.045 Uiso 1 1 calc R . . 
C24 C 0.7956(4) 0.4327(4) 0.0167(5) 0.0358(16) Uani 1 1 d . . . 
H24 H 0.7882 0.4899 0.0053 0.043 Uiso 1 1 calc R . . 
C25 C 0.7659(5) 0.8390(5) 0.1688(5) 0.0396(17) Uani 1 1 d . . . 
C26 C 1.4434(5) 0.2691(5) 0.0429(5) 0.0409(18) Uani 1 1 d . . . 
C27 C 0.7037(5) 0.2942(5) -0.0231(5) 0.0381(17) Uani 1 1 d . . . 
C28 C 0.0757(5) 1.1068(6) 0.4156(5) 0.052(2) Uani 1 1 d . . . 
C29 C 0.0266(5) 1.0954(6) 0.3783(5) 0.052(2) Uani 1 1 d . . . 
H29 H 0.0576 1.0825 0.3308 0.062 Uiso 1 1 calc R . . 
C30 C -0.0675(5) 1.1026(6) 0.4094(5) 0.050(2) Uani 1 1 d . . . 
C31 C -0.1131(5) 1.1221(6) 0.4812(5) 0.050(2) Uani 1 1 d . . . 
H31 H -0.1763 1.1286 0.5022 0.060 Uiso 1 1 calc R . . 
C32 C -0.0651(5) 1.1321(6) 0.5217(5) 0.051(2) Uani 1 1 d . . . 
C33 C 0.0298(5) 1.1258(6) 0.4870(5) 0.053(2) Uani 1 1 d . . . 
H33 H 0.0624 1.1343 0.5119 0.064 Uiso 1 1 calc R . . 
C34 C 0.1773(5) 1.0923(6) 0.3836(5) 0.051(2) Uani 1 1 d . . . 
C35 C 0.2274(5) 1.0263(6) 0.3524(5) 0.046(2) Uani 1 1 d . . . 
H35 H 0.1964 0.9943 0.3486 0.056 Uiso 1 1 calc R . . 
C36 C 0.3225(5) 1.0073(5) 0.3267(4) 0.0434(18) Uani 1 1 d . . . 
H36 H 0.3546 0.9620 0.3076 0.052 Uiso 1 1 calc R . . 
C37 C 0.3698(5) 1.0563(5) 0.3297(5) 0.0460(19) Uani 1 1 d . . . 
C38 C 0.3202(5) 1.1248(6) 0.3581(6) 0.060(2) Uani 1 1 d . . . 
H38 H 0.3511 1.1591 0.3585 0.072 Uiso 1 1 calc R . . 
C39 C 0.2247(5) 1.1419(7) 0.3857(6) 0.067(3) Uani 1 1 d . . . 
H39 H 0.1924 1.1866 0.4057 0.080 Uiso 1 1 calc R . . 
C40 C -0.1175(5) 1.0856(6) 0.3705(5) 0.047(2) Uani 1 1 d . . . 
C41 C -0.0910(5) 1.1057(6) 0.2866(5) 0.048(2) Uani 1 1 d . . . 
H41 H -0.0442 1.1342 0.2546 0.057 Uiso 1 1 calc R . . 
C42 C -0.1331(5) 1.0838(5) 0.2517(5) 0.0435(19) Uani 1 1 d . . . 
H42 H -0.1145 1.0973 0.1963 0.052 Uiso 1 1 calc R . . 
C43 C -0.2031(5) 1.0417(5) 0.2981(5) 0.0442(19) Uani 1 1 d . . . 
C44 C -0.2302(5) 1.0200(6) 0.3820(5) 0.051(2) Uani 1 1 d . . . 
H44 H -0.2766 0.9909 0.4134 0.061 Uiso 1 1 calc R . . 
C45 C -0.1880(5) 1.0421(6) 0.4175(5) 0.050(2) Uani 1 1 d . . . 
H45 H -0.2064 1.0281 0.4730 0.061 Uiso 1 1 calc R . . 
C46 C -0.1131(5) 1.1414(6) 0.6026(5) 0.049(2) Uani 1 1 d . . . 
C47 C -0.2021(5) 1.1896(6) 0.6227(5) 0.052(2) Uani 1 1 d . . . 
H47 H -0.2314 1.2198 0.5833 0.062 Uiso 1 1 calc R . . 
C48 C -0.2469(5) 1.1936(6) 0.6982(5) 0.050(2) Uani 1 1 d . . . 
H48 H -0.3050 1.2283 0.7092 0.060 Uiso 1 1 calc R . . 
C49 C -0.2060(5) 1.1457(6) 0.7599(5) 0.048(2) Uani 1 1 d . . . 
C50 C -0.1175(5) 1.0973(6) 0.7412(5) 0.050(2) Uani 1 1 d . . . 
H50 H -0.0891 1.0652 0.7811 0.059 Uiso 1 1 calc R . . 
C51 C -0.0716(5) 1.0968(6) 0.6634(5) 0.054(2) Uani 1 1 d . . . 
H51 H -0.0115 1.0658 0.6513 0.065 Uiso 1 1 calc R . . 
C52 C 0.4721(5) 1.0394(5) 0.2997(5) 0.0440(18) Uani 1 1 d . . . 
C53 C -0.2500(5) 1.0211(6) 0.2582(6) 0.049(2) Uani 1 1 d . . . 
C54 C -0.2541(5) 1.1469(6) 0.8442(5) 0.047(2) Uani 1 1 d . . . 
C55 C 0.5793(5) 1.0467(5) 0.0895(6) 0.047(2) Uani 1 1 d . . . 
H55 H 0.5435 1.0071 0.1190 0.057 Uiso 1 1 calc R . . 
C56 C 0.4900(9) 0.3114(9) 0.7782(8) 0.084(3) Uani 1 1 d . . . 
C57 C 0.5107(7) 0.2351(9) 0.6880(7) 0.084(4) Uani 1 1 d . . . 
C58 C 0.4980(8) 0.1648(7) 0.8326(8) 0.080(3) Uani 1 1 d . . . 
C59 C 1.8486(9) -0.1174(8) -0.0641(8) 0.084(3) Uani 1 1 d . . . 
C60 C 1.7979(9) -0.1214(9) -0.1601(8) 0.095(4) Uani 1 1 d . . . 
C61 C 1.6847(11) -0.0786(10) -0.0429(15) 0.165(9) Uani 1 1 d . . . 
C62 C 1.580(3) 0.3892(11) 0.172(2) 2.1(4) Uani 1 1 d D . . 
C63 C 1.493(3) 0.430(2) 0.090(3) 0.29(2) Uani 1 1 d . . . 
C64 C 1.5403(16) 0.5365(9) 0.1166(14) 0.163(8) Uani 1 1 d D . . 
C65 C 2.0034(12) 0.1231(9) -0.1416(10) 0.123(5) Uiso 1 1 d D . . 
C66 C 1.9203(13) 0.2737(10) -0.2048(11) 0.165(8) Uiso 1 1 d D . . 
C67 C 2.0568(14) 0.1957(15) -0.2777(12) 0.199 Uiso 1 1 d D . . 
C68 C 1.038(2) 0.328(3) 0.346(3) 0.360 Uiso 1 1 d D . . 
C69 C 0.911(3) 0.442(2) 0.355(4) 0.537 Uiso 1 1 d D . . 
C70 C 0.903(2) 0.329(2) 0.328(2) 0.308 Uiso 1 1 d D . . 
C71 C 0.567(2) 0.1654(19) 0.5105(16) 0.242 Uiso 1 1 d D . . 
C72 C 0.545(2) 0.194(2) 0.3849(14) 0.274 Uiso 1 1 d D . . 
C73 C 0.508(2) 0.0737(15) 0.4919(17) 0.218 Uiso 1 1 d D . . 
N1 N 0.4993(5) 0.2391(5) 0.7673(5) 0.062(2) Uani 1 1 d . . . 
N2 N 1.7723(6) -0.1086(5) -0.0888(5) 0.068(2) Uani 1 1 d . . . 
N3 N 1.5336(19) 0.4617(15) 0.125(2) 0.38(3) Uani 1 1 d D . . 
N4 N 1.9899(10) 0.1986(8) -0.2047(8) 0.127(4) Uiso 1 1 d D . . 
N5 N 0.943(2) 0.3567(16) 0.3616(15) 0.306 Uiso 1 1 d D . . 
N6 N 0.5260(15) 0.1523(13) 0.4668(14) 0.211 Uiso 1 1 d D . . 
O1 O 1.4785(3) 0.2474(4) 0.0969(4) 0.0553(15) Uani 1 1 d . . . 
O2 O 1.4887(3) 0.2667(4) -0.0281(3) 0.0459(13) Uani 1 1 d . . . 
O3 O 0.8107(4) 0.8938(3) 0.1295(4) 0.0498(14) Uani 1 1 d . . . 
O4 O 0.6853(3) 0.8514(3) 0.2168(3) 0.0465(13) Uani 1 1 d . . . 
O5 O 0.6970(3) 0.2163(3) 0.0090(3) 0.0340(11) Uani 1 1 d . . . 
O6 O 0.6671(4) 0.3455(4) -0.0745(4) 0.0549(15) Uani 1 1 d . . . 
O7 O 0.5126(3) 0.9696(4) 0.2829(4) 0.0492(14) Uani 1 1 d . . . 
O8 O 0.5130(3) 1.0896(4) 0.2917(4) 0.0502(14) Uani 1 1 d . . . 
O9 O -0.2469(4) 1.0621(4) 0.1868(4) 0.0581(17) Uani 1 1 d . . . 
O10 O -0.2930(4) 0.9622(4) 0.2995(4) 0.0581(17) Uani 1 1 d . . . 
O11 O -0.2227(4) 1.0962(4) 0.8995(3) 0.0525(14) Uani 1 1 d . . . 
O12 O -0.3292(3) 1.2049(4) 0.8529(3) 0.0481(14) Uani 1 1 d . . . 
O13 O 0.6334(3) 1.0481(3) 0.1198(3) 0.0404(12) Uani 1 1 d . . . 
O14 O 0.5697(4) 1.0943(4) 0.0228(4) 0.0479(13) Uani 1 1 d . . . 
O15 O 0.4906(14) 0.3779(9) 0.7230(10) 0.192(7) Uani 1 1 d . . . 
O16 O 1.9270(5) -0.1381(5) -0.1032(5) 0.089(2) Uani 1 1 d . . . 
O18 O 1.586(2) 0.3164(8) 0.2118(9) 0.339(18) Uani 1 1 d D . . 
O19 O 1.9536(13) 0.1309(10) -0.0690(11) 0.214 Uiso 1 1 d D . . 
O20 O 1.054(3) 0.371(2) 0.371(2) 0.424 Uiso 1 1 d D . . 
O21 O 0.601(4) 0.220(3) 0.501(4) 0.638 Uiso 1 1 d D . . 
O1W O 0.6851(16) 0.3746(15) 0.7543(14) 0.267(10) Uiso 1 1 d . . . 
O2W O 0.6965(19) 0.7254(18) 0.3904(17) 0.313(12) Uiso 1 1 d . . . 
 
loop_ 
 _atom_site_aniso_label 
 _atom_site_aniso_U_11 
 _atom_site_aniso_U_22 
 _atom_site_aniso_U_33 
 _atom_site_aniso_U_23 
 _atom_site_aniso_U_13 
 _atom_site_aniso_U_12 
Zn1 0.0168(4) 0.0584(6) 0.0474(5) -0.0380(4) -0.0091(3) -0.0013(3) 
Zn2 0.0206(4) 0.0468(5) 0.0527(5) -0.0349(4) -0.0076(3) -0.0020(3) 
K1 0.0304(8) 0.0490(9) 0.0532(10) -0.0312(8) -0.0120(7) -0.0046(7) 
K2 0.0311(8) 0.0538(10) 0.0503(10) -0.0271(8) -0.0154(7) -0.0042(7) 
K3 0.391(15) 0.286(11) 0.330(13) -0.147(10) 0.036(11) -0.144(11) 
C1 0.022(3) 0.045(4) 0.051(4) -0.032(4) -0.010(3) -0.004(3) 
C2 0.022(3) 0.050(4) 0.051(4) -0.031(4) -0.010(3) -0.006(3) 
C3 0.022(3) 0.043(4) 0.048(4) -0.031(3) -0.008(3) -0.005(3) 
C4 0.016(3) 0.040(4) 0.055(4) -0.031(3) -0.012(3) 0.003(3) 
C5 0.021(3) 0.039(4) 0.048(4) -0.026(3) -0.009(3) -0.004(3) 
C6 0.019(3) 0.039(4) 0.057(5) -0.029(4) -0.013(3) 0.001(3) 
C7 0.021(3) 0.045(4) 0.054(4) -0.033(4) -0.011(3) -0.003(3) 
C8 0.024(3) 0.077(6) 0.058(5) -0.052(5) -0.013(3) 0.002(3) 
C9 0.027(4) 0.080(6) 0.063(5) -0.048(5) -0.017(4) 0.000(4) 
C10 0.019(3) 0.048(4) 0.052(4) -0.031(4) -0.015(3) 0.003(3) 
C11 0.023(3) 0.042(4) 0.044(4) -0.029(3) -0.011(3) 0.003(3) 
C12 0.023(3) 0.041(4) 0.049(4) -0.027(3) -0.015(3) -0.001(3) 
C13 0.026(3) 0.041(4) 0.049(4) -0.031(3) -0.010(3) -0.005(3) 
C14 0.019(3) 0.044(4) 0.058(5) -0.034(4) -0.007(3) -0.005(3) 
C15 0.017(3) 0.052(4) 0.057(5) -0.038(4) -0.007(3) -0.001(3) 
C16 0.026(3) 0.048(4) 0.048(4) -0.030(4) -0.012(3) -0.007(3) 
C17 0.027(3) 0.044(4) 0.052(4) -0.031(4) -0.006(3) -0.006(3) 
C18 0.020(3) 0.053(4) 0.060(5) -0.040(4) -0.010(3) -0.003(3) 
C19 0.022(3) 0.038(4) 0.048(4) -0.027(3) -0.007(3) -0.006(3) 
C20 0.026(3) 0.042(4) 0.055(5) -0.027(4) -0.018(3) -0.001(3) 
C21 0.025(3) 0.040(4) 0.060(5) -0.030(4) -0.016(3) -0.001(3) 
C22 0.021(3) 0.049(4) 0.048(4) -0.030(4) -0.011(3) -0.002(3) 
C23 0.027(3) 0.043(4) 0.053(4) -0.027(4) -0.017(3) 0.001(3) 
C24 0.028(3) 0.033(4) 0.058(5) -0.022(3) -0.021(3) 0.000(3) 
C25 0.032(4) 0.044(4) 0.059(5) -0.035(4) -0.019(4) 0.002(3) 
C26 0.021(3) 0.054(5) 0.061(5) -0.036(4) -0.012(3) -0.001(3) 
C27 0.024(3) 0.057(5) 0.048(4) -0.035(4) -0.011(3) -0.002(3) 
C28 0.026(4) 0.085(6) 0.058(5) -0.048(5) -0.008(3) -0.004(4) 
C29 0.024(4) 0.094(7) 0.054(5) -0.050(5) -0.006(3) -0.006(4) 
C30 0.025(4) 0.083(6) 0.053(5) -0.042(5) -0.008(3) -0.005(4) 
C31 0.023(3) 0.092(6) 0.052(5) -0.052(5) -0.010(3) 0.000(4) 
C32 0.024(4) 0.086(6) 0.059(5) -0.050(5) -0.011(3) -0.001(4) 
C33 0.021(4) 0.093(7) 0.065(5) -0.057(5) -0.010(3) 0.001(4) 
C34 0.021(4) 0.094(7) 0.050(5) -0.046(5) -0.007(3) -0.004(4) 
C35 0.026(4) 0.082(6) 0.045(4) -0.037(4) -0.010(3) -0.009(4) 
C36 0.027(4) 0.069(5) 0.043(4) -0.035(4) -0.005(3) -0.005(3) 
C37 0.025(4) 0.070(5) 0.050(5) -0.035(4) -0.006(3) -0.006(4) 
C38 0.027(4) 0.085(7) 0.088(7) -0.062(6) -0.006(4) -0.008(4) 
C39 0.022(4) 0.110(8) 0.093(7) -0.075(7) -0.010(4) 0.000(4) 
C40 0.023(3) 0.087(6) 0.048(4) -0.046(4) -0.009(3) -0.005(4) 
C41 0.027(4) 0.074(6) 0.049(5) -0.035(4) -0.011(3) -0.002(4) 
C42 0.033(4) 0.060(5) 0.046(4) -0.034(4) -0.018(3) 0.009(3) 
C43 0.030(4) 0.064(5) 0.051(5) -0.041(4) -0.017(3) 0.009(3) 
C44 0.024(4) 0.081(6) 0.064(5) -0.050(5) -0.014(4) 0.003(4) 
C45 0.026(4) 0.090(6) 0.044(4) -0.040(4) -0.010(3) -0.002(4) 
C46 0.020(3) 0.086(6) 0.064(5) -0.054(5) -0.010(3) -0.003(4) 
C47 0.024(4) 0.091(6) 0.055(5) -0.045(5) -0.012(3) -0.002(4) 
C48 0.020(3) 0.088(6) 0.061(5) -0.051(5) -0.010(3) -0.003(4) 
C49 0.026(4) 0.083(6) 0.056(5) -0.049(5) -0.008(3) -0.010(4) 
C50 0.026(4) 0.084(6) 0.065(5) -0.056(5) -0.018(4) 0.002(4) 
C51 0.023(4) 0.097(7) 0.066(5) -0.060(5) -0.013(4) 0.001(4) 
C52 0.027(4) 0.066(5) 0.040(4) -0.027(4) -0.004(3) -0.006(4) 
C53 0.034(4) 0.059(5) 0.073(6) -0.050(5) -0.025(4) 0.012(4) 
C54 0.022(4) 0.079(6) 0.060(5) -0.051(5) -0.004(3) -0.010(4) 
C55 0.036(4) 0.054(5) 0.068(6) -0.039(5) -0.011(4) -0.010(4) 
C56 0.086(8) 0.090(9) 0.102(9) -0.045(8) -0.029(7) -0.030(7) 
C57 0.058(6) 0.146(11) 0.082(7) -0.075(8) -0.009(5) -0.026(7) 
C58 0.083(8) 0.077(7) 0.094(8) -0.016(7) -0.038(7) -0.034(6) 
C59 0.081(8) 0.085(8) 0.108(9) -0.048(7) -0.033(7) -0.019(6) 
C60 0.100(9) 0.112(10) 0.075(8) -0.014(7) -0.019(7) -0.055(8) 
C61 0.089(11) 0.103(11) 0.26(2) -0.104(14) 0.040(13) -0.032(9) 
C62 2.0(4) 0.51(11) 2.0(4) -0.83(19) 2.0(4) -0.81(19) 
C63 0.28(4) 0.18(3) 0.46(6) -0.02(3) -0.17(4) -0.12(3) 
C64 0.22(2) 0.072(10) 0.23(2) -0.032(12) -0.107(19) -0.031(12) 
N1 0.030(4) 0.084(6) 0.091(6) -0.052(5) -0.013(4) -0.010(4) 
N2 0.078(6) 0.055(5) 0.067(5) -0.027(4) -0.012(4) -0.013(4) 
N3 0.24(3) 0.21(3) 0.61(7) -0.27(4) 0.15(4) -0.12(2) 
O1 0.024(3) 0.092(4) 0.067(4) -0.049(3) -0.020(3) 0.004(3) 
O2 0.022(2) 0.067(4) 0.055(3) -0.035(3) -0.010(2) 0.000(2) 
O3 0.035(3) 0.045(3) 0.079(4) -0.037(3) -0.012(3) -0.004(2) 
O4 0.024(3) 0.054(3) 0.073(4) -0.044(3) -0.007(2) -0.002(2) 
O5 0.024(2) 0.044(3) 0.047(3) -0.030(2) -0.011(2) -0.003(2) 
O6 0.059(4) 0.054(3) 0.076(4) -0.022(3) -0.043(3) -0.010(3) 
O7 0.025(3) 0.059(3) 0.068(4) -0.037(3) -0.004(2) -0.005(2) 
O8 0.027(3) 0.065(4) 0.066(4) -0.034(3) -0.006(2) -0.012(3) 
O9 0.051(3) 0.077(4) 0.072(4) -0.057(4) -0.038(3) 0.020(3) 
O10 0.037(3) 0.082(4) 0.083(4) -0.063(4) -0.025(3) 0.007(3) 
O11 0.042(3) 0.080(4) 0.052(3) -0.044(3) -0.017(3) -0.002(3) 
O12 0.027(3) 0.081(4) 0.055(3) -0.049(3) -0.007(2) -0.006(3) 
O13 0.020(2) 0.056(3) 0.055(3) -0.032(3) -0.009(2) -0.005(2) 
O14 0.040(3) 0.062(4) 0.059(4) -0.032(3) -0.018(3) -0.013(3) 
O15 0.32(2) 0.110(9) 0.199(14) -0.019(10) -0.139(15) -0.072(12) 
O16 0.055(4) 0.084(5) 0.099(6) -0.040(5) 0.003(4) 0.000(4) 
O18 0.68(5) 0.132(12) 0.147(12) -0.095(10) 0.064(19) -0.18(2) 
 
_geom_special_details 
; 
 All esds (except the esd in the dihedral angle between two l.s. planes) 
 are estimated using the full covariance matrix.  The cell esds are taken 
 into account individually in the estimation of esds in distances, angles 
 and torsion angles; correlations between esds in cell parameters are only 
 used when they are defined by crystal symmetry.  An approximate (isotropic) 
 treatment of cell esds is used for estimating esds involving l.s. planes. 
; 
 
loop_ 
 _geom_bond_atom_site_label_1 
 _geom_bond_atom_site_label_2 
 _geom_bond_distance 
 _geom_bond_site_symmetry_2 
 _geom_bond_publ_flag 
Zn1 O12 1.961(5) 1_744 ? 
Zn1 O2 1.968(5) . ? 
Zn1 O5 1.978(4) 1_655 ? 
Zn1 O14 2.019(6) 1_645 ? 
Zn1 K1 3.7982(18) . ? 
Zn1 K2 3.8069(18) . ? 
Zn2 O4 1.970(5) . ? 
Zn2 O7 1.979(5) . ? 
Zn2 O10 2.002(5) 1_655 ? 
Zn2 O13 2.029(6) . ? 
Zn2 K2 3.6840(19) 1_465 ? 
Zn2 K1 3.8052(19) 1_465 ? 
K1 O19 2.641(18) . ? 
K1 O11 2.671(6) 1_744 ? 
K1 O3 2.705(6) 1_645 ? 
K1 O9 2.766(6) 1_745 ? 
K1 O13 2.859(5) 1_645 ? 
K1 O5 2.894(5) 1_655 ? 
K1 K3 3.132(11) . ? 
K1 K3 3.144(14) 2_955 ? 
K1 Zn2 3.8052(19) 1_645 ? 
K1 K2 4.200(2) . ? 
K2 O18 2.530(12) . ? 
K2 O8 2.600(6) 1_645 ? 
K2 O1 2.622(5) . ? 
K2 O9 2.755(6) 1_745 ? 
K2 O5 2.767(5) 1_655 ? 
K2 O13 2.976(5) 1_645 ? 
K2 C27 3.366(8) 1_655 ? 
K2 C62 3.41(4) . ? 
K2 C53 3.447(8) 1_745 ? 
K2 Zn2 3.6840(19) 1_645 ? 
K3 O19 2.34(2) 2_955 ? 
K3 O16 2.784(15) . ? 
K3 C65 3.098(17) . ? 
K3 C59 3.115(17) . ? 
K3 K1 3.144(14) 2_955 ? 
K3 O19 3.18(2) . ? 
K3 C65 3.30(2) 2_955 ? 
K3 K3 3.44(2) 2_955 ? 
C1 C2 1.384(9) . ? 
C1 C6 1.401(9) . ? 
C1 C7 1.493(9) . ? 
C2 C3 1.390(9) . ? 
C2 H2 0.9300 . ? 
C3 C4 1.407(9) . ? 
C3 C13 1.482(9) . ? 
C4 C5 1.397(9) . ? 
C4 H4 0.9300 . ? 
C5 C6 1.400(9) . ? 
C5 C19 1.484(9) . ? 
C6 H6 0.9300 . ? 
C7 C8 1.396(10) . ? 
C7 C12 1.412(10) . ? 
C8 C9 1.408(10) . ? 
C8 H8 0.9300 . ? 
C9 C10 1.370(10) . ? 
C9 H9 0.9300 . ? 
C10 C11 1.409(9) . ? 
C10 C26 1.502(9) . ? 
C11 C12 1.384(9) . ? 
C11 H11 0.9300 . ? 
C12 H12 0.9300 . ? 
C13 C14 1.390(9) . ? 
C13 C18 1.399(10) . ? 
C14 C15 1.395(10) . ? 
C14 H14 0.9300 . ? 
C15 C16 1.378(10) . ? 
C15 H15 0.9300 . ? 
C16 C17 1.396(10) . ? 
C16 C25 1.496(10) . ? 
C17 C18 1.386(10) . ? 
C17 H17 0.9300 . ? 
C18 H18 0.9300 . ? 
C19 C20 1.395(10) . ? 
C19 C24 1.397(10) . ? 
C20 C21 1.374(9) . ? 
C20 H20 0.9300 . ? 
C21 C22 1.412(10) . ? 
C21 H21 0.9300 . ? 
C22 C23 1.376(10) . ? 
C22 C27 1.504(9) . ? 
C23 C24 1.383(9) . ? 
C23 H23 0.9300 . ? 
C24 H24 0.9300 . ? 
C25 O3 1.237(9) . ? 
C25 O4 1.275(9) . ? 
C26 O1 1.242(9) . ? 
C26 O2 1.276(9) . ? 
C27 O6 1.230(9) . ? 
C27 O5 1.299(9) . ? 
C27 K2 3.366(8) 1_455 ? 
C28 C29 1.379(11) . ? 
C28 C33 1.393(11) . ? 
C28 C34 1.488(10) . ? 
C29 C30 1.388(10) . ? 
C29 H29 0.9300 . ? 
C30 C31 1.405(10) . ? 
C30 C40 1.477(10) . ? 
C31 C32 1.403(10) . ? 
C31 H31 0.9300 . ? 
C32 C33 1.405(10) . ? 
C32 C46 1.484(11) . ? 
C33 H33 0.9300 . ? 
C34 C35 1.395(11) . ? 
C34 C39 1.395(12) . ? 
C35 C36 1.388(10) . ? 
C35 H35 0.9300 . ? 
C36 C37 1.394(11) . ? 
C36 H36 0.9300 . ? 
C37 C38 1.402(11) . ? 
C37 C52 1.494(10) . ? 
C38 C39 1.394(11) . ? 
C38 H38 0.9300 . ? 
C39 H39 0.9300 . ? 
C40 C45 1.406(12) . ? 
C40 C41 1.409(11) . ? 
C41 C42 1.365(11) . ? 
C41 H41 0.9300 . ? 
C42 C43 1.384(12) . ? 
C42 H42 0.9300 . ? 
C43 C44 1.406(11) . ? 
C43 C53 1.493(10) . ? 
C44 C45 1.380(11) . ? 
C44 H44 0.9300 . ? 
C45 H45 0.9300 . ? 
C46 C51 1.395(12) . ? 
C46 C47 1.395(10) . ? 
C47 C48 1.357(11) . ? 
C47 H47 0.9300 . ? 
C48 C49 1.406(12) . ? 
C48 H48 0.9300 . ? 
C49 C50 1.389(10) . ? 
C49 C54 1.496(11) . ? 
C50 C51 1.380(11) . ? 
C50 H50 0.9300 . ? 
C51 H51 0.9300 . ? 
C52 O8 1.231(10) . ? 
C52 O7 1.302(9) . ? 
C53 O9 1.249(11) . ? 
C53 O10 1.276(11) . ? 
C53 K2 3.447(8) 1_365 ? 
C54 O11 1.237(10) . ? 
C54 O12 1.302(9) . ? 
C55 O14 1.248(10) . ? 
C55 O13 1.254(9) . ? 
C55 H55 0.9300 . ? 
C56 O15 1.225(17) . ? 
C56 N1 1.346(14) . ? 
C57 N1 1.491(13) . ? 
C58 N1 1.402(14) . ? 
C59 O16 1.212(14) . ? 
C59 N2 1.444(15) . ? 
C60 N2 1.357(15) . ? 
C61 N2 1.397(17) . ? 
C62 O18 1.202(10) . ? 
C62 N3 1.402(10) . ? 
C63 N3 1.48(5) . ? 
C64 N3 1.33(3) . ? 
C65 O19 1.34(2) . ? 
C65 N4 1.413(9) . ? 
C65 K3 3.30(2) 2_955 ? 
C66 N4 1.424(9) . ? 
C67 N4 1.399(9) . ? 
C68 O20 1.215(10) . ? 
C68 N5 1.394(10) . ? 
C69 N5 1.402(10) . ? 
C70 N5 1.400(10) . ? 
C71 O21 1.201(10) . ? 
C71 N6 1.392(9) . ? 
C72 N6 1.388(10) . ? 
C73 N6 1.394(10) . ? 
O3 K1 2.705(6) 1_465 ? 
O5 Zn1 1.978(4) 1_455 ? 
O5 K2 2.767(5) 1_455 ? 
O5 K1 2.894(5) 1_455 ? 
O8 K2 2.600(6) 1_465 ? 
O9 K2 2.755(6) 1_365 ? 
O9 K1 2.766(6) 1_365 ? 
O10 Zn2 2.002(5) 1_455 ? 
O11 K1 2.671(6) 1_366 ? 
O12 Zn1 1.961(5) 1_366 ? 
O13 K1 2.859(5) 1_465 ? 
O13 K2 2.976(5) 1_465 ? 
O14 Zn1 2.019(6) 1_465 ? 
O19 K3 2.34(2) 2_955 ? 
 
loop_ 
 _geom_angle_atom_site_label_1 
 _geom_angle_atom_site_label_2 
 _geom_angle_atom_site_label_3 
 _geom_angle 
 _geom_angle_site_symmetry_1 
 _geom_angle_site_symmetry_3 
 _geom_angle_publ_flag 
O12 Zn1 O2 104.3(2) 1_744 . ? 
O12 Zn1 O5 113.4(2) 1_744 1_655 ? 
O2 Zn1 O5 124.4(2) . 1_655 ? 
O12 Zn1 O14 104.9(2) 1_744 1_645 ? 
O2 Zn1 O14 89.8(2) . 1_645 ? 
O5 Zn1 O14 116.5(2) 1_655 1_645 ? 
O12 Zn1 K1 95.63(16) 1_744 . ? 
O2 Zn1 K1 159.49(17) . . ? 
O5 Zn1 K1 48.47(14) 1_655 . ? 
O14 Zn1 K1 80.13(16) 1_645 . ? 
O12 Zn1 K2 157.53(15) 1_744 . ? 
O2 Zn1 K2 94.76(16) . . ? 
O5 Zn1 K2 44.44(14) 1_655 . ? 
O14 Zn1 K2 86.78(16) 1_645 . ? 
K1 Zn1 K2 67.04(4) . . ? 
O4 Zn2 O7 100.3(2) . . ? 
O4 Zn2 O10 107.1(2) . 1_655 ? 
O7 Zn2 O10 110.7(2) . 1_655 ? 
O4 Zn2 O13 107.2(2) . . ? 
O7 Zn2 O13 97.3(2) . . ? 
O10 Zn2 O13 130.1(3) 1_655 . ? 
O4 Zn2 K2 159.56(18) . 1_465 ? 
O7 Zn2 K2 90.58(16) . 1_465 ? 
O10 Zn2 K2 84.6(2) 1_655 1_465 ? 
O13 Zn2 K2 53.78(14) . 1_465 ? 
O4 Zn2 K1 93.61(16) . 1_465 ? 
O7 Zn2 K1 144.83(18) . 1_465 ? 
O10 Zn2 K1 95.4(2) 1_655 1_465 ? 
O13 Zn2 K1 47.55(13) . 1_465 ? 
K2 Zn2 K1 68.20(4) 1_465 1_465 ? 
O19 K1 O11 81.7(4) . 1_744 ? 
O19 K1 O3 136.2(4) . 1_645 ? 
O11 K1 O3 113.69(19) 1_744 1_645 ? 
O19 K1 O9 117.4(5) . 1_745 ? 
O11 K1 O9 143.47(17) 1_744 1_745 ? 
O3 K1 O9 75.28(19) 1_645 1_745 ? 
O19 K1 O13 152.9(4) . 1_645 ? 
O11 K1 O13 87.40(16) 1_744 1_645 ? 
O3 K1 O13 70.90(16) 1_645 1_645 ? 
O9 K1 O13 61.22(16) 1_745 1_645 ? 
O19 K1 O5 86.8(4) . 1_655 ? 
O11 K1 O5 70.54(16) 1_744 1_655 ? 
O3 K1 O5 136.69(16) 1_645 1_655 ? 
O9 K1 O5 79.33(16) 1_745 1_655 ? 
O13 K1 O5 66.18(15) 1_645 1_655 ? 
O19 K1 K3 66.1(4) . . ? 
O11 K1 K3 85.2(3) 1_744 . ? 
O3 K1 K3 74.3(2) 1_645 . ? 
O9 K1 K3 130.3(3) 1_745 . ? 
O13 K1 K3 137.7(2) 1_645 . ? 
O5 K1 K3 146.2(2) 1_655 . ? 
O19 K1 K3 46.7(4) . 2_955 ? 
O11 K1 K3 127.2(2) 1_744 2_955 ? 
O3 K1 K3 100.7(2) 1_645 2_955 ? 
O9 K1 K3 81.9(2) 1_745 2_955 ? 
O13 K1 K3 143.1(2) 1_645 2_955 ? 
O5 K1 K3 109.8(2) 1_655 2_955 ? 
K3 K1 K3 66.4(3) . 2_955 ? 
O19 K1 Zn1 101.6(4) . . ? 
O11 K1 Zn1 47.79(12) 1_744 . ? 
O3 K1 Zn1 119.34(12) 1_645 . ? 
O9 K1 Zn1 96.21(12) 1_745 . ? 
O13 K1 Zn1 53.99(11) 1_645 . ? 
O5 K1 Zn1 30.77(9) 1_655 . ? 
K3 K1 Zn1 133.0(3) . . ? 
K3 K1 Zn1 138.2(2) 2_955 . ? 
O19 K1 Zn2 160.5(4) . 1_645 ? 
O11 K1 Zn2 115.42(14) 1_744 1_645 ? 
O3 K1 Zn2 47.71(11) 1_645 1_645 ? 
O9 K1 Zn2 43.25(14) 1_745 1_645 ? 
O13 K1 Zn2 31.59(11) 1_645 1_645 ? 
O5 K1 Zn2 90.29(10) 1_655 1_645 ? 
K3 K1 Zn2 122.00(19) . 1_645 ? 
K3 K1 Zn2 117.4(2) 2_955 1_645 ? 
Zn1 K1 Zn2 85.18(4) . 1_645 ? 
O19 K1 K2 114.2(4) . . ? 
O11 K1 K2 104.36(13) 1_744 . ? 
O3 K1 K2 101.74(12) 1_645 . ? 
O9 K1 K2 40.38(12) 1_745 . ? 
O13 K1 K2 45.08(10) 1_645 . ? 
O5 K1 K2 40.95(10) 1_655 . ? 
K3 K1 K2 170.4(3) . . ? 
K3 K1 K2 106.37(19) 2_955 . ? 
Zn1 K1 K2 56.58(3) . . ? 
Zn2 K1 K2 54.53(3) 1_645 . ? 
O18 K2 O8 107.8(4) . 1_645 ? 
O18 K2 O1 103.9(7) . . ? 
O8 K2 O1 92.09(19) 1_645 . ? 
O18 K2 O9 117.8(7) . 1_745 ? 
O8 K2 O9 83.9(2) 1_645 1_745 ? 
O1 K2 O9 137.38(18) . 1_745 ? 
O18 K2 O5 113.1(4) . 1_655 ? 
O8 K2 O5 138.76(17) 1_645 1_655 ? 
O1 K2 O5 73.70(16) . 1_655 ? 
O9 K2 O5 81.76(17) 1_745 1_655 ? 
O18 K2 O13 177.5(7) . 1_645 ? 
O8 K2 O13 73.12(16) 1_645 1_645 ? 
O1 K2 O13 78.34(17) . 1_645 ? 
O9 K2 O13 59.85(15) 1_745 1_645 ? 
O5 K2 O13 66.21(14) 1_655 1_645 ? 
O18 K2 C27 91.7(4) . 1_655 ? 
O8 K2 C27 158.53(18) 1_645 1_655 ? 
O1 K2 C27 74.09(18) . 1_655 ? 
O9 K2 C27 95.16(19) 1_745 1_655 ? 
O5 K2 C27 21.77(15) 1_655 1_655 ? 
O13 K2 C27 87.79(16) 1_645 1_655 ? 
O18 K2 C62 16.1(9) . . ? 
O8 K2 C62 120.6(5) 1_645 . ? 
O1 K2 C62 92.9(11) . . ? 
O9 K2 C62 125.5(10) 1_745 . ? 
O5 K2 C62 99.0(5) 1_655 . ? 
O13 K2 C62 164.3(7) 1_645 . ? 
C27 K2 C62 77.2(6) 1_655 . ? 
O18 K2 C53 109.3(7) . 1_745 ? 
O8 K2 C53 69.0(2) 1_645 1_745 ? 
O1 K2 C53 145.5(2) . 1_745 ? 
O9 K2 C53 19.42(18) 1_745 1_745 ? 
O5 K2 C53 101.18(18) 1_655 1_745 ? 
O13 K2 C53 68.75(16) 1_645 1_745 ? 
C27 K2 C53 113.6(2) 1_655 1_745 ? 
C62 K2 C53 121.6(11) . 1_745 ? 
O18 K2 Zn2 145.8(5) . 1_645 ? 
O8 K2 Zn2 49.78(12) 1_645 1_645 ? 
O1 K2 Zn2 102.57(15) . 1_645 ? 
O9 K2 Zn2 44.95(14) 1_745 1_645 ? 
O5 K2 Zn2 94.90(11) 1_655 1_645 ? 
O13 K2 Zn2 33.38(11) 1_645 1_645 ? 
C27 K2 Zn2 116.35(13) 1_655 1_645 ? 
C62 K2 Zn2 161.6(9) . 1_645 ? 
C53 K2 Zn2 43.10(14) 1_745 1_645 ? 
O18 K2 Zn1 127.3(4) . . ? 
O8 K2 Zn1 115.24(14) 1_645 . ? 
O1 K2 Zn1 47.81(12) . . ? 
O9 K2 Zn1 96.20(12) 1_745 . ? 
O5 K2 Zn1 30.04(9) 1_655 . ? 
O13 K2 Zn1 53.38(11) 1_645 . ? 
C27 K2 Zn1 43.41(12) 1_655 . ? 
C62 K2 Zn1 111.2(8) . . ? 
C53 K2 Zn1 113.44(13) 1_745 . ? 
Zn2 K2 Zn1 86.75(4) 1_645 . ? 
O18 K2 K1 134.9(6) . . ? 
O8 K2 K1 107.04(13) 1_645 . ? 
O1 K2 K1 102.50(13) . . ? 
O9 K2 K1 40.57(12) 1_745 . ? 
O5 K2 K1 43.29(10) 1_655 . ? 
O13 K2 K1 42.87(9) 1_645 . ? 
C27 K2 K1 61.68(13) 1_655 . ? 
C62 K2 K1 129.2(5) . . ? 
C53 K2 K1 59.44(14) 1_745 . ? 
Zn2 K2 K1 57.27(4) 1_645 . ? 
Zn1 K2 K1 56.38(3) . . ? 
O19 K3 O16 124.3(6) 2_955 . ? 
O19 K3 C65 120.4(7) 2_955 . ? 
O16 K3 C65 115.3(6) . . ? 
O19 K3 C59 121.1(6) 2_955 . ? 
O16 K3 C59 22.8(3) . . ? 
C65 K3 C59 112.6(6) . . ? 
O19 K3 K1 94.6(6) 2_955 . ? 
O16 K3 K1 102.1(4) . . ? 
C65 K3 K1 70.3(4) . . ? 
C59 K3 K1 80.0(4) . . ? 
O19 K3 K1 55.3(6) 2_955 2_955 ? 
O16 K3 K1 144.3(4) . 2_955 ? 
C65 K3 K1 78.1(4) . 2_955 ? 
C59 K3 K1 165.5(4) . 2_955 ? 
K1 K3 K1 113.6(3) . 2_955 ? 
O19 K3 O19 104.6(6) 2_955 . ? 
O16 K3 O19 126.6(7) . . ? 
C65 K3 O19 24.6(4) . . ? 
C59 K3 O19 114.0(6) . . ? 
K1 K3 O19 49.5(4) . . ? 
K1 K3 O19 79.9(4) 2_955 . ? 
O19 K3 C65 19.5(5) 2_955 2_955 ? 
O16 K3 C65 124.9(5) . 2_955 ? 
C65 K3 C65 115.0(4) . 2_955 ? 
C59 K3 C65 113.4(5) . 2_955 ? 
K1 K3 C65 75.4(4) . 2_955 ? 
K1 K3 C65 67.7(4) 2_955 2_955 ? 
O19 K3 C65 94.0(5) . 2_955 ? 
O19 K3 K3 63.4(6) 2_955 2_955 ? 
O16 K3 K3 159.0(7) . 2_955 ? 
C65 K3 K3 60.3(4) . 2_955 ? 
C59 K3 K3 136.6(6) . 2_955 ? 
K1 K3 K3 57.0(3) . 2_955 ? 
K1 K3 K3 56.6(4) 2_955 2_955 ? 
O19 K3 K3 41.2(4) . 2_955 ? 
C65 K3 K3 54.7(4) 2_955 2_955 ? 
C2 C1 C6 119.7(6) . . ? 
C2 C1 C7 119.9(6) . . ? 
C6 C1 C7 120.2(6) . . ? 
C1 C2 C3 121.3(6) . . ? 
C1 C2 H2 119.4 . . ? 
C3 C2 H2 119.4 . . ? 
C2 C3 C4 118.5(6) . . ? 
C2 C3 C13 122.4(6) . . ? 
C4 C3 C13 118.9(6) . . ? 
C5 C4 C3 121.4(6) . . ? 
C5 C4 H4 119.3 . . ? 
C3 C4 H4 119.3 . . ? 
C4 C5 C6 118.6(6) . . ? 
C4 C5 C19 120.7(6) . . ? 
C6 C5 C19 120.6(6) . . ? 
C5 C6 C1 120.5(6) . . ? 
C5 C6 H6 119.8 . . ? 
C1 C6 H6 119.8 . . ? 
C8 C7 C12 119.0(6) . . ? 
C8 C7 C1 121.6(6) . . ? 
C12 C7 C1 119.1(6) . . ? 
C7 C8 C9 119.8(7) . . ? 
C7 C8 H8 120.1 . . ? 
C9 C8 H8 120.1 . . ? 
C10 C9 C8 120.9(7) . . ? 
C10 C9 H9 119.5 . . ? 
C8 C9 H9 119.5 . . ? 
C9 C10 C11 119.5(6) . . ? 
C9 C10 C26 120.7(6) . . ? 
C11 C10 C26 119.8(6) . . ? 
C12 C11 C10 120.3(6) . . ? 
C12 C11 H11 119.8 . . ? 
C10 C11 H11 119.8 . . ? 
C11 C12 C7 120.3(6) . . ? 
C11 C12 H12 119.9 . . ? 
C7 C12 H12 119.9 . . ? 
C14 C13 C18 118.2(6) . . ? 
C14 C13 C3 122.0(6) . . ? 
C18 C13 C3 119.7(6) . . ? 
C13 C14 C15 120.7(6) . . ? 
C13 C14 H14 119.7 . . ? 
C15 C14 H14 119.7 . . ? 
C16 C15 C14 121.0(6) . . ? 
C16 C15 H15 119.5 . . ? 
C14 C15 H15 119.5 . . ? 
C15 C16 C17 118.5(6) . . ? 
C15 C16 C25 121.0(6) . . ? 
C17 C16 C25 120.4(6) . . ? 
C18 C17 C16 120.8(7) . . ? 
C18 C17 H17 119.6 . . ? 
C16 C17 H17 119.6 . . ? 
C17 C18 C13 120.6(6) . . ? 
C17 C18 H18 119.7 . . ? 
C13 C18 H18 119.7 . . ? 
C20 C19 C24 118.1(6) . . ? 
C20 C19 C5 121.5(6) . . ? 
C24 C19 C5 120.3(6) . . ? 
C21 C20 C19 120.8(7) . . ? 
C21 C20 H20 119.6 . . ? 
C19 C20 H20 119.6 . . ? 
C20 C21 C22 120.5(7) . . ? 
C20 C21 H21 119.7 . . ? 
C22 C21 H21 119.7 . . ? 
C23 C22 C21 118.7(6) . . ? 
C23 C22 C27 119.9(6) . . ? 
C21 C22 C27 121.4(7) . . ? 
C22 C23 C24 120.5(7) . . ? 
C22 C23 H23 119.7 . . ? 
C24 C23 H23 119.7 . . ? 
C23 C24 C19 121.2(6) . . ? 
C23 C24 H24 119.4 . . ? 
C19 C24 H24 119.4 . . ? 
O3 C25 O4 123.4(6) . . ? 
O3 C25 C16 120.0(6) . . ? 
O4 C25 C16 116.6(7) . . ? 
O1 C26 O2 124.2(6) . . ? 
O1 C26 C10 118.7(7) . . ? 
O2 C26 C10 117.1(6) . . ? 
O6 C27 O5 122.8(6) . . ? 
O6 C27 C22 119.5(7) . . ? 
O5 C27 C22 117.6(6) . . ? 
O6 C27 K2 128.6(5) . 1_455 ? 
O5 C27 K2 52.2(3) . 1_455 ? 
C22 C27 K2 87.6(4) . 1_455 ? 
C29 C28 C33 119.2(7) . . ? 
C29 C28 C34 120.4(7) . . ? 
C33 C28 C34 120.1(7) . . ? 
C28 C29 C30 122.2(7) . . ? 
C28 C29 H29 118.9 . . ? 
C30 C29 H29 118.9 . . ? 
C29 C30 C31 118.0(7) . . ? 
C29 C30 C40 121.0(7) . . ? 
C31 C30 C40 120.9(6) . . ? 
C32 C31 C30 121.3(7) . . ? 
C32 C31 H31 119.3 . . ? 
C30 C31 H31 119.3 . . ? 
C31 C32 C33 118.3(7) . . ? 
C31 C32 C46 119.9(7) . . ? 
C33 C32 C46 121.6(7) . . ? 
C28 C33 C32 120.9(7) . . ? 
C28 C33 H33 119.6 . . ? 
C32 C33 H33 119.6 . . ? 
C35 C34 C39 118.5(7) . . ? 
C35 C34 C28 119.7(7) . . ? 
C39 C34 C28 121.8(7) . . ? 
C36 C35 C34 121.4(7) . . ? 
C36 C35 H35 119.3 . . ? 
C34 C35 H35 119.3 . . ? 
C35 C36 C37 119.9(7) . . ? 
C35 C36 H36 120.0 . . ? 
C37 C36 H36 120.0 . . ? 
C36 C37 C38 119.2(7) . . ? 
C36 C37 C52 121.2(7) . . ? 
C38 C37 C52 119.6(7) . . ? 
C39 C38 C37 120.4(8) . . ? 
C39 C38 H38 119.8 . . ? 
C37 C38 H38 119.8 . . ? 
C38 C39 C34 120.5(8) . . ? 
C38 C39 H39 119.8 . . ? 
C34 C39 H39 119.8 . . ? 
C45 C40 C41 118.4(7) . . ? 
C45 C40 C30 120.0(7) . . ? 
C41 C40 C30 121.4(7) . . ? 
C42 C41 C40 120.9(8) . . ? 
C42 C41 H41 119.6 . . ? 
C40 C41 H41 119.6 . . ? 
C41 C42 C43 120.6(7) . . ? 
C41 C42 H42 119.7 . . ? 
C43 C42 H42 119.7 . . ? 
C42 C43 C44 119.8(7) . . ? 
C42 C43 C53 119.5(7) . . ? 
C44 C43 C53 120.7(8) . . ? 
C45 C44 C43 119.8(8) . . ? 
C45 C44 H44 120.1 . . ? 
C43 C44 H44 120.1 . . ? 
C44 C45 C40 120.5(7) . . ? 
C44 C45 H45 119.8 . . ? 
C40 C45 H45 119.8 . . ? 
C51 C46 C47 117.3(7) . . ? 
C51 C46 C32 120.0(7) . . ? 
C47 C46 C32 122.6(7) . . ? 
C48 C47 C46 121.8(8) . . ? 
C48 C47 H47 119.1 . . ? 
C46 C47 H47 119.1 . . ? 
C47 C48 C49 120.5(7) . . ? 
C47 C48 H48 119.7 . . ? 
C49 C48 H48 119.7 . . ? 
C50 C49 C48 118.7(7) . . ? 
C50 C49 C54 119.3(7) . . ? 
C48 C49 C54 122.0(7) . . ? 
C51 C50 C49 119.9(8) . . ? 
C51 C50 H50 120.0 . . ? 
C49 C50 H50 120.0 . . ? 
C50 C51 C46 121.7(7) . . ? 
C50 C51 H51 119.1 . . ? 
C46 C51 H51 119.1 . . ? 
O8 C52 O7 123.9(7) . . ? 
O8 C52 C37 120.9(7) . . ? 
O7 C52 C37 115.2(7) . . ? 
O9 C53 O10 122.7(7) . . ? 
O9 C53 C43 119.4(8) . . ? 
O10 C53 C43 117.9(8) . . ? 
O9 C53 K2 47.2(4) . 1_365 ? 
O10 C53 K2 107.9(5) . 1_365 ? 
C43 C53 K2 112.8(5) . 1_365 ? 
O11 C54 O12 124.3(7) . . ? 
O11 C54 C49 121.0(7) . . ? 
O12 C54 C49 114.6(8) . . ? 
O14 C55 O13 124.9(8) . . ? 
O14 C55 H55 117.5 . . ? 
O13 C55 H55 117.5 . . ? 
O15 C56 N1 121.7(13) . . ? 
O16 C59 N2 121.3(11) . . ? 
O16 C59 K3 63.0(7) . . ? 
N2 C59 K3 158.1(8) . . ? 
O18 C62 N3 148(6) . . ? 
O18 C62 K2 36(2) . . ? 
N3 C62 K2 122(3) . . ? 
O19 C65 N4 112.9(15) . . ? 
O19 C65 K3 80.9(10) . . ? 
N4 C65 K3 154.2(12) . . ? 
O19 C65 K3 35.5(9) . 2_955 ? 
N4 C65 K3 138.4(12) . 2_955 ? 
K3 C65 K3 65.0(4) . 2_955 ? 
O20 C68 N5 101(3) . . ? 
O21 C71 N6 135(4) . . ? 
C56 N1 C58 119.3(10) . . ? 
C56 N1 C57 122.2(11) . . ? 
C58 N1 C57 118.5(9) . . ? 
C60 N2 C61 128.9(14) . . ? 
C60 N2 C59 113.5(10) . . ? 
C61 N2 C59 117.0(13) . . ? 
C64 N3 C62 120(2) . . ? 
C64 N3 C63 135(3) . . ? 
C62 N3 C63 105(3) . . ? 
C67 N4 C65 112.3(16) . . ? 
C67 N4 C66 117.2(13) . . ? 
C65 N4 C66 130.5(15) . . ? 
C68 N5 C70 115.6(17) . . ? 
C68 N5 C69 114.3(17) . . ? 
C70 N5 C69 115.0(17) . . ? 
C72 N6 C71 119.3(16) . . ? 
C72 N6 C73 115(3) . . ? 
C71 N6 C73 118.0(16) . . ? 
C26 O1 K2 160.1(5) . . ? 
C26 O2 Zn1 111.2(5) . . ? 
C25 O3 K1 149.8(5) . 1_465 ? 
C25 O4 Zn2 112.3(5) . . ? 
C27 O5 Zn1 108.2(4) . 1_455 ? 
C27 O5 K2 106.0(4) . 1_455 ? 
Zn1 O5 K2 105.52(18) 1_455 1_455 ? 
C27 O5 K1 136.9(4) . 1_455 ? 
Zn1 O5 K1 100.76(17) 1_455 1_455 ? 
K2 O5 K1 95.76(16) 1_455 1_455 ? 
C52 O7 Zn2 110.7(5) . . ? 
C52 O8 K2 134.7(5) . 1_465 ? 
C53 O9 K2 113.4(5) . 1_365 ? 
C53 O9 K1 144.0(5) . 1_365 ? 
K2 O9 K1 99.05(19) 1_365 1_365 ? 
C53 O10 Zn2 104.4(5) . 1_455 ? 
C54 O11 K1 153.6(5) . 1_366 ? 
C54 O12 Zn1 110.8(5) . 1_366 ? 
C55 O13 Zn2 120.8(5) . . ? 
C55 O13 K1 122.7(5) . 1_465 ? 
Zn2 O13 K1 100.86(18) . 1_465 ? 
C55 O13 K2 120.5(5) . 1_465 ? 
Zn2 O13 K2 92.83(17) . 1_465 ? 
K1 O13 K2 92.05(14) 1_465 1_465 ? 
C55 O14 Zn1 122.0(5) . 1_465 ? 
C59 O16 K3 94.1(8) . . ? 
C62 O18 K2 128(3) . . ? 
C65 O19 K3 125.0(13) . 2_955 ? 
C65 O19 K1 125.3(14) . . ? 
K3 O19 K1 78.0(6) 2_955 . ? 
C65 O19 K3 74.4(10) . . ? 
K3 O19 K3 75.4(6) 2_955 . ? 
K1 O19 K3 64.4(4) . . ? 
 
_diffrn_measured_fraction_theta_max    0.999 
_diffrn_reflns_theta_full              25.20 
_diffrn_measured_fraction_theta_full   0.999 
_refine_diff_density_max    1.610 
_refine_diff_density_min   -1.168 
_refine_diff_density_rms    0.205 

 
data_1_Squeeze
 
_audit_creation_method            SHELXL-97 
_chemical_name_systematic 
; 
 ? 
; 
_chemical_name_common             ? 
_chemical_melting_point           ? 
_chemical_formula_moiety          ? 
_chemical_formula_sum 
 'C54 H30 Na2 O13 Zn3' 
_chemical_formula_weight          1128.87 
 
loop_ 
 _atom_type_symbol 
 _atom_type_description 
 _atom_type_scat_dispersion_real 
 _atom_type_scat_dispersion_imag 
 _atom_type_scat_source 
 'C'  'C'   0.0033   0.0016 
 'International Tables Vol C Tables 4.2.6.8 and 6.1.1.4' 
 'H'  'H'   0.0000   0.0000 
 'International Tables Vol C Tables 4.2.6.8 and 6.1.1.4' 
 'O'  'O'   0.0106   0.0060 
 'International Tables Vol C Tables 4.2.6.8 and 6.1.1.4' 
 'Zn'  'Zn'   0.2839   1.4301 
 'International Tables Vol C Tables 4.2.6.8 and 6.1.1.4' 
 'Na'  'Na'   0.0362   0.0249 
 'International Tables Vol C Tables 4.2.6.8 and 6.1.1.4' 
 
_symmetry_cell_setting            Octhorhombic 
_symmetry_space_group_name_H-M    Pnma 
 
loop_ 
 _symmetry_equiv_pos_as_xyz 
 'x, y, z' 
 '-x+1/2, -y, z+1/2' 
 '-x, y+1/2, -z' 
 'x+1/2, -y+1/2, -z+1/2' 
 '-x, -y, -z' 
 'x-1/2, y, -z-1/2' 
 'x, -y-1/2, z' 
 '-x-1/2, y-1/2, z-1/2' 
 
_cell_length_a                    17.108(4) 
_cell_length_b                    21.644(5) 
_cell_length_c                    25.258(6) 
_cell_angle_alpha                 90.00 
_cell_angle_beta                  90.00 
_cell_angle_gamma                 90.00 
_cell_volume                      9353(4) 
_cell_formula_units_Z             4 
_cell_measurement_temperature     273(2) 
_cell_measurement_reflns_used     1032 
_cell_measurement_theta_min       3.22 
_cell_measurement_theta_max       27.48 
 
_exptl_crystal_description        block 
_exptl_crystal_colour             colorless
_exptl_crystal_size_max           0.20
_exptl_crystal_size_mid           0.17
_exptl_crystal_size_min           0.16
_exptl_crystal_density_meas       none
_exptl_crystal_density_diffrn     0.802 
_exptl_crystal_density_method     'not measured' 
_exptl_crystal_F_000              2280 
_exptl_absorpt_coefficient_mu     0.807 
_exptl_absorpt_correction_type    multi-scans
_exptl_absorpt_correction_T_min   0.86532
_exptl_absorpt_correction_T_max   1.00000
_exptl_absorpt_process_details    sadabs
 
_exptl_special_details 
; 
 ? 
; 
 
_diffrn_ambient_temperature       273(2) 
_diffrn_radiation_wavelength      0.71073 
_diffrn_radiation_type            MoK\a 
_diffrn_radiation_source          'fine-focus sealed tube' 
_diffrn_radiation_monochromator   graphite 
_diffrn_measurement_device_type   ? 
_diffrn_measurement_method        ? 
_diffrn_detector_area_resol_mean  ? 
_diffrn_standards_number          ? 
_diffrn_standards_interval_count  ? 
_diffrn_standards_interval_time   ? 
_diffrn_standards_decay_%         ? 
_diffrn_reflns_number             97973 
_diffrn_reflns_av_R_equivalents   0.1116 
_diffrn_reflns_av_sigmaI/netI     0.0502 
_diffrn_reflns_limit_h_min        -20 
_diffrn_reflns_limit_h_max        20 
_diffrn_reflns_limit_k_min        -25 
_diffrn_reflns_limit_k_max        25 
_diffrn_reflns_limit_l_min        -30 
_diffrn_reflns_limit_l_max        30 
_diffrn_reflns_theta_min          1.24 
_diffrn_reflns_theta_max          25.20 
_reflns_number_total              8661 
_reflns_number_gt                 6291 
_reflns_threshold_expression      >2sigma(I) 
 
_computing_data_collection        ? 
_computing_cell_refinement        ? 
_computing_data_reduction         ? 
_computing_structure_solution     'SHELXS-97 (Sheldrick, 1990)' 
_computing_structure_refinement   'SHELXL-97 (Sheldrick, 1997)' 
_computing_molecular_graphics     ? 
_computing_publication_material   ? 
 
_refine_special_details 
; 
 Refinement of F^2^ against ALL reflections.  The weighted R-factor wR and 
 goodness of fit S are based on F^2^, conventional R-factors R are based 
 on F, with F set to zero for negative F^2^. The threshold expression of 
 F^2^ > 2sigma(F^2^) is used only for calculating R-factors(gt) etc. and is 
 not relevant to the choice of reflections for refinement.  R-factors based 
 on F^2^ are statistically about twice as large as those based on F, and R- 
 factors based on ALL data will be even larger. 
; 
 
_refine_ls_structure_factor_coef  Fsqd  
_refine_ls_matrix_type            full 
_refine_ls_weighting_scheme       calc  
_refine_ls_weighting_details 
 'calc w=1/[\s^2^(Fo^2^)+(0.1020P)^2^+0.0000P] where P=(Fo^2^+2Fc^2^)/3' 
_atom_sites_solution_primary      direct 
_atom_sites_solution_secondary    difmap 
_atom_sites_solution_hydrogens    geom 
_refine_ls_hydrogen_treatment     constr 
_refine_ls_extinction_method      none 
_refine_ls_extinction_coef        ? 
_refine_ls_number_reflns          8661 
_refine_ls_number_parameters      331 
_refine_ls_number_restraints      0 
_refine_ls_R_factor_all           0.0705 
_refine_ls_R_factor_gt            0.0519 
_refine_ls_wR_factor_ref          0.1503 
_refine_ls_wR_factor_gt           0.1446 
_refine_ls_goodness_of_fit_ref    0.959 
_refine_ls_restrained_S_all       0.959 
_refine_ls_shift/su_max           0.001 
_refine_ls_shift/su_mean          0.000 
 
loop_ 
 _atom_site_label 
 _atom_site_type_symbol 
 _atom_site_fract_x 
 _atom_site_fract_y 
 _atom_site_fract_z 
 _atom_site_U_iso_or_equiv 
 _atom_site_adp_type 
 _atom_site_occupancy 
 _atom_site_symmetry_multiplicity 
 _atom_site_calc_flag 
 _atom_site_refinement_flags 
 _atom_site_disorder_assembly 
 _atom_site_disorder_group 
Zn1 Zn 0.38082(2) -0.2500 0.186337(17) 0.02521(14) Uani 1 2 d S . . 
Zn2 Zn 0.492909(19) -0.165397(17) 0.115756(13) 0.03324(13) Uani 1 1 d . . . 
Na1 Na 0.6026(3) -0.2500 0.21163(18) 0.178(2) Uani 1 2 d S . . 
Na2 Na 0.2842(2) -0.2500 0.23407(16) 0.1421(14) Uani 1 2 d S . . 
C1 C 0.49798(18) 0.02960(19) 0.40608(16) 0.0531(11) Uani 1 1 d . . . 
C2 C 0.43360(19) 0.0505(2) 0.43405(14) 0.0595(11) Uani 1 1 d . . . 
H2 H 0.3837 0.0409 0.4219 0.071 Uiso 1 1 calc R . . 
C3 C 0.4419(2) 0.0850(2) 0.47957(15) 0.0613(12) Uani 1 1 d . . . 
C4 C 0.5179(2) 0.0998(2) 0.49778(16) 0.0620(12) Uani 1 1 d . . . 
H4 H 0.5242 0.1243 0.5277 0.074 Uiso 1 1 calc R . . 
C5 C 0.58338(19) 0.07751(19) 0.47088(15) 0.0575(11) Uani 1 1 d . . . 
C6 C 0.57291(18) 0.04502(18) 0.42456(14) 0.0517(10) Uani 1 1 d . . . 
H6 H 0.6165 0.0330 0.4051 0.062 Uiso 1 1 calc R . . 
C7 C 0.48873(16) -0.01104(19) 0.35826(14) 0.0483(10) Uani 1 1 d . . . 
C8 C 0.43212(18) -0.05540(19) 0.35750(14) 0.0567(11) Uani 1 1 d . . . 
H8 H 0.3983 -0.0593 0.3861 0.068 Uiso 1 1 calc R . . 
C9 C 0.42463(19) -0.0946(2) 0.31453(13) 0.0577(11) Uani 1 1 d . . . 
H9 H 0.3871 -0.1257 0.3152 0.069 Uiso 1 1 calc R . . 
C10 C 0.47191(18) -0.08820(17) 0.27103(13) 0.0418(8) Uani 1 1 d . . . 
C11 C 0.5278(2) -0.04125(17) 0.27077(14) 0.0488(9) Uani 1 1 d . . . 
H11 H 0.5598 -0.0358 0.2413 0.059 Uiso 1 1 calc R . . 
C12 C 0.5358(2) -0.00326(18) 0.31360(15) 0.0565(11) Uani 1 1 d . . . 
H12 H 0.5729 0.0281 0.3130 0.068 Uiso 1 1 calc R . . 
C13 C 0.3719(2) 0.1065(2) 0.50990(16) 0.0629(12) Uani 1 1 d . . . 
C14 C 0.3008(2) 0.1172(2) 0.48389(16) 0.0767(15) Uani 1 1 d . . . 
H14 H 0.2983 0.1120 0.4474 0.092 Uiso 1 1 calc R . . 
C15 C 0.2352(2) 0.1349(2) 0.51057(14) 0.0602(11) Uani 1 1 d . . . 
H15 H 0.1888 0.1420 0.4924 0.072 Uiso 1 1 calc R . . 
C16 C 0.2383(2) 0.14247(18) 0.56538(14) 0.0497(9) Uani 1 1 d . . . 
C17 C 0.30729(19) 0.13267(17) 0.59132(14) 0.0505(9) Uani 1 1 d . . . 
H17 H 0.3097 0.1385 0.6278 0.061 Uiso 1 1 calc R . . 
C18 C 0.3738(2) 0.1141(2) 0.56410(16) 0.0638(12) Uani 1 1 d . . . 
H18 H 0.4199 0.1068 0.5825 0.077 Uiso 1 1 calc R . . 
C19 C 0.6641(2) 0.0880(2) 0.49362(15) 0.0635(12) Uani 1 1 d . . . 
C20 C 0.6838(2) 0.1415(2) 0.51796(16) 0.0610(11) Uani 1 1 d . . . 
H20 H 0.6476 0.1734 0.5202 0.073 Uiso 1 1 calc R . . 
C21 C 0.7605(2) 0.14909(18) 0.54043(14) 0.0502(9) Uani 1 1 d . . . 
H21 H 0.7735 0.1852 0.5584 0.060 Uiso 1 1 calc R . . 
C22 C 0.8130(2) 0.1034(2) 0.53512(16) 0.0652(12) Uani 1 1 d . . . 
C23 C 0.7939(2) 0.0488(2) 0.51133(19) 0.0770(14) Uani 1 1 d . . . 
H23 H 0.8298 0.0166 0.5099 0.092 Uiso 1 1 calc R . . 
C24 C 0.7196(2) 0.0421(2) 0.48920(19) 0.0822(16) Uani 1 1 d . . . 
H24 H 0.7072 0.0059 0.4712 0.099 Uiso 1 1 calc R . . 
C25 C 0.46349(17) -0.13185(16) 0.22519(12) 0.0366(7) Uani 1 1 d . . . 
C26 C 0.16513(19) 0.16213(16) 0.59484(14) 0.0445(9) Uani 1 1 d . . . 
C27 C 0.8953(2) 0.1111(2) 0.56020(18) 0.0652(12) Uani 1 1 d . . . 
O1 O 0.49476(13) -0.11550(11) 0.18085(9) 0.0459(6) Uani 1 1 d . . . 
O2 O 0.42571(13) -0.18012(11) 0.23323(8) 0.0459(6) Uani 1 1 d . . . 
O3 O 0.9418(2) 0.06719(19) 0.55884(19) 0.1342(18) Uani 1 1 d . . . 
O4 O 0.90794(14) 0.15959(13) 0.58078(10) 0.0585(7) Uani 1 1 d . . . 
O5 O 0.17510(14) 0.18251(12) 0.64004(9) 0.0539(7) Uani 1 1 d . . . 
O6 O 0.10075(13) 0.15419(11) 0.57196(9) 0.0464(6) Uani 1 1 d . . . 
O7 O 0.48562(13) -0.2500 0.14382(10) 0.0238(6) Uani 1 2 d S . . 
 
loop_ 
 _atom_site_aniso_label 
 _atom_site_aniso_U_11 
 _atom_site_aniso_U_22 
 _atom_site_aniso_U_33 
 _atom_site_aniso_U_23 
 _atom_site_aniso_U_13 
 _atom_site_aniso_U_12 
Zn1 0.0164(2) 0.0384(3) 0.0209(2) 0.000 -0.00171(18) 0.000 
Zn2 0.0287(2) 0.0412(2) 0.0298(2) 0.00206(16) 0.00238(14) -0.00323(15) 
Na1 0.130(3) 0.280(6) 0.124(3) 0.000 -0.006(3) 0.000 
Na2 0.113(3) 0.191(4) 0.123(3) 0.000 0.016(2) 0.000 
C1 0.0269(18) 0.074(3) 0.059(2) -0.040(2) -0.0064(15) -0.0002(16) 
C2 0.0243(17) 0.095(3) 0.059(2) -0.039(2) -0.0051(16) -0.0020(18) 
C3 0.0283(18) 0.096(3) 0.060(2) -0.045(2) -0.0045(17) 0.0132(19) 
C4 0.036(2) 0.083(3) 0.068(3) -0.050(2) -0.0052(18) 0.0009(19) 
C5 0.0272(18) 0.072(3) 0.073(3) -0.043(2) 0.0000(17) -0.0091(17) 
C6 0.0210(16) 0.074(3) 0.060(2) -0.043(2) 0.0037(15) -0.0043(16) 
C7 0.0143(15) 0.076(3) 0.055(2) -0.035(2) -0.0015(14) 0.0023(15) 
C8 0.0231(17) 0.093(3) 0.054(2) -0.034(2) 0.0037(15) -0.0134(18) 
C9 0.0247(18) 0.097(3) 0.051(2) -0.033(2) 0.0074(16) -0.0159(18) 
C10 0.0258(16) 0.059(2) 0.0405(19) -0.0155(16) -0.0024(14) 0.0002(15) 
C11 0.0342(18) 0.062(2) 0.050(2) -0.0191(18) 0.0046(16) -0.0053(17) 
C12 0.0290(18) 0.067(3) 0.074(3) -0.039(2) 0.0034(18) -0.0104(17) 
C13 0.036(2) 0.089(3) 0.064(3) -0.044(2) -0.0056(17) 0.020(2) 
C14 0.045(2) 0.129(4) 0.056(2) -0.052(3) -0.0114(19) 0.031(2) 
C15 0.0325(19) 0.105(3) 0.043(2) -0.026(2) -0.0043(16) 0.024(2) 
C16 0.0408(19) 0.068(2) 0.0402(19) -0.0195(18) 0.0016(15) 0.0152(18) 
C17 0.0349(19) 0.067(2) 0.050(2) -0.0242(19) -0.0075(16) 0.0162(17) 
C18 0.0321(19) 0.087(3) 0.073(3) -0.047(2) -0.0092(18) 0.0165(19) 
C19 0.041(2) 0.090(3) 0.059(2) -0.048(2) -0.0012(18) -0.021(2) 
C20 0.037(2) 0.074(3) 0.072(3) -0.022(2) -0.0065(19) -0.0004(19) 
C21 0.041(2) 0.062(2) 0.047(2) -0.0273(18) -0.0015(16) -0.0111(18) 
C22 0.042(2) 0.085(3) 0.069(3) -0.024(2) -0.0012(19) -0.004(2) 
C23 0.032(2) 0.091(3) 0.109(4) -0.043(3) -0.018(2) 0.001(2) 
C24 0.0218(19) 0.112(4) 0.113(4) -0.063(3) -0.010(2) -0.006(2) 
C25 0.0226(15) 0.053(2) 0.0346(18) -0.0099(15) 0.0005(13) -0.0025(15) 
C26 0.0287(18) 0.057(2) 0.048(2) -0.0051(17) 0.0017(15) 0.0145(16) 
C27 0.039(2) 0.082(3) 0.075(3) -0.018(3) -0.009(2) -0.008(2) 
O1 0.0468(14) 0.0459(14) 0.0450(14) -0.0104(11) 0.0041(11) -0.0124(11) 
O2 0.0432(14) 0.0629(16) 0.0317(12) -0.0189(11) 0.0062(10) -0.0107(12) 
O3 0.066(2) 0.108(3) 0.229(5) -0.065(3) -0.065(3) 0.031(2) 
O4 0.0360(14) 0.078(2) 0.0614(17) -0.0064(15) -0.0170(12) -0.0099(13) 
O5 0.0433(14) 0.0794(18) 0.0391(14) -0.0224(13) -0.0106(11) 0.0334(13) 
O6 0.0278(12) 0.0720(17) 0.0394(13) -0.0129(12) 0.0027(10) 0.0114(11) 
O7 0.0102(12) 0.0310(15) 0.0302(15) 0.000 -0.0003(10) 0.000 
 
_geom_special_details 
; 
 All esds (except the esd in the dihedral angle between two l.s. planes) 
 are estimated using the full covariance matrix.  The cell esds are taken 
 into account individually in the estimation of esds in distances, angles 
 and torsion angles; correlations between esds in cell parameters are only 
 used when they are defined by crystal symmetry.  An approximate (isotropic) 
 treatment of cell esds is used for estimating esds involving l.s. planes. 
; 
 
loop_ 
 _geom_bond_atom_site_label_1 
 _geom_bond_atom_site_label_2 
 _geom_bond_distance 
 _geom_bond_site_symmetry_2 
 _geom_bond_publ_flag 
Zn1 Na2 2.046(4) . ? 
Zn1 O2 2.069(2) . ? 
Zn1 O2 2.069(2) 7 ? 
Zn1 O7 2.090(2) . ? 
Zn1 O5 2.102(2) 8_655 ? 
Zn1 O5 2.102(2) 2_554 ? 
Zn2 O4 1.917(2) 2_654 ? 
Zn2 O6 1.962(2) 2_554 ? 
Zn2 O1 1.967(2) . ? 
Zn2 O7 1.9675(11) . ? 
Zn2 Na1 3.569(4) . ? 
Na1 O7 2.634(5) . ? 
Na1 Na2 3.396(6) 6_656 ? 
Na1 Zn2 3.569(4) 7 ? 
Na2 O2 2.854(4) . ? 
Na2 O2 2.854(4) 7 ? 
Na2 O5 2.874(4) 8_655 ? 
Na2 O5 2.874(4) 2_554 ? 
Na2 Na1 3.396(6) 6_556 ? 
C1 C2 1.384(5) . ? 
C1 C6 1.405(4) . ? 
C1 C7 1.503(5) . ? 
C2 C3 1.380(5) . ? 
C2 H2 0.9300 . ? 
C3 C4 1.414(5) . ? 
C3 C13 1.496(5) . ? 
C4 C5 1.396(5) . ? 
C4 H4 0.9300 . ? 
C5 C6 1.377(4) . ? 
C5 C19 1.513(5) . ? 
C6 H6 0.9300 . ? 
C7 C8 1.364(5) . ? 
C7 C12 1.396(5) . ? 
C8 C9 1.384(5) . ? 
C8 H8 0.9300 . ? 
C9 C10 1.371(4) . ? 
C9 H9 0.9300 . ? 
C10 C11 1.396(5) . ? 
C10 C25 1.501(4) . ? 
C11 C12 1.366(5) . ? 
C11 H11 0.9300 . ? 
C12 H12 0.9300 . ? 
C13 C18 1.379(5) . ? 
C13 C14 1.401(5) . ? 
C14 C15 1.364(5) . ? 
C14 H14 0.9300 . ? 
C15 C16 1.395(5) . ? 
C15 H15 0.9300 . ? 
C16 C17 1.366(5) . ? 
C16 C26 1.517(4) . ? 
C17 C18 1.389(5) . ? 
C17 H17 0.9300 . ? 
C18 H18 0.9300 . ? 
C19 C20 1.352(5) . ? 
C19 C24 1.379(6) . ? 
C20 C21 1.440(5) . ? 
C20 H20 0.9300 . ? 
C21 C22 1.342(5) . ? 
C21 H21 0.9300 . ? 
C22 C23 1.366(6) . ? 
C22 C27 1.553(5) . ? 
C23 C24 1.397(5) . ? 
C23 H23 0.9300 . ? 
C24 H24 0.9300 . ? 
C25 O2 1.245(4) . ? 
C25 O1 1.291(4) . ? 
C26 O5 1.236(4) . ? 
C26 O6 1.256(4) . ? 
C27 O4 1.190(5) . ? 
C27 O3 1.240(5) . ? 
O4 Zn2 1.917(2) 2_655 ? 
O5 Zn1 2.102(2) 2 ? 
O5 Na2 2.874(4) 2 ? 
O6 Zn2 1.962(2) 2 ? 
O7 Zn2 1.9675(11) 7 ? 
 
loop_ 
 _geom_angle_atom_site_label_1 
 _geom_angle_atom_site_label_2 
 _geom_angle_atom_site_label_3 
 _geom_angle 
 _geom_angle_site_symmetry_1 
 _geom_angle_site_symmetry_3 
 _geom_angle_publ_flag 
Na2 Zn1 O2 87.84(10) . . ? 
Na2 Zn1 O2 87.84(10) . 7 ? 
O2 Zn1 O2 93.95(14) . 7 ? 
Na2 Zn1 O7 174.81(13) . . ? 
O2 Zn1 O7 88.61(8) . . ? 
O2 Zn1 O7 88.61(8) 7 . ? 
Na2 Zn1 O5 87.72(10) . 8_655 ? 
O2 Zn1 O5 174.68(10) . 8_655 ? 
O2 Zn1 O5 88.82(11) 7 8_655 ? 
O7 Zn1 O5 96.00(8) . 8_655 ? 
Na2 Zn1 O5 87.72(10) . 2_554 ? 
O2 Zn1 O5 88.82(11) . 2_554 ? 
O2 Zn1 O5 174.68(10) 7 2_554 ? 
O7 Zn1 O5 96.00(8) . 2_554 ? 
O5 Zn1 O5 88.06(16) 8_655 2_554 ? 
O4 Zn2 O6 117.05(11) 2_654 2_554 ? 
O4 Zn2 O1 109.57(10) 2_654 . ? 
O6 Zn2 O1 114.61(10) 2_554 . ? 
O4 Zn2 O7 106.45(11) 2_654 . ? 
O6 Zn2 O7 105.45(10) 2_554 . ? 
O1 Zn2 O7 102.17(10) . . ? 
O4 Zn2 Na1 83.17(12) 2_654 . ? 
O6 Zn2 Na1 151.08(9) 2_554 . ? 
O1 Zn2 Na1 72.91(9) . . ? 
O7 Zn2 Na1 46.48(8) . . ? 
O7 Na1 Na2 163.3(2) . 6_656 ? 
O7 Na1 Zn2 32.79(4) . 7 ? 
Na2 Na1 Zn2 139.03(11) 6_656 7 ? 
O7 Na1 Zn2 32.79(4) . . ? 
Na2 Na1 Zn2 139.03(11) 6_656 . ? 
Zn2 Na1 Zn2 61.73(8) 7 . ? 
Zn1 Na2 O2 46.41(8) . . ? 
Zn1 Na2 O2 46.41(8) . 7 ? 
O2 Na2 O2 64.00(13) . 7 ? 
Zn1 Na2 O5 46.94(8) . 8_655 ? 
O2 Na2 O5 93.32(13) . 8_655 ? 
O2 Na2 O5 61.26(9) 7 8_655 ? 
Zn1 Na2 O5 46.94(8) . 2_554 ? 
O2 Na2 O5 61.26(9) . 2_554 ? 
O2 Na2 O5 93.32(13) 7 2_554 ? 
O5 Na2 O5 61.10(13) 8_655 2_554 ? 
Zn1 Na2 Na1 167.7(2) . 6_556 ? 
O2 Na2 Na1 141.15(10) . 6_556 ? 
O2 Na2 Na1 141.15(10) 7 6_556 ? 
O5 Na2 Na1 123.73(14) 8_655 6_556 ? 
O5 Na2 Na1 123.73(14) 2_554 6_556 ? 
C2 C1 C6 118.6(3) . . ? 
C2 C1 C7 121.2(3) . . ? 
C6 C1 C7 120.1(3) . . ? 
C3 C2 C1 121.4(3) . . ? 
C3 C2 H2 119.3 . . ? 
C1 C2 H2 119.3 . . ? 
C2 C3 C4 119.2(3) . . ? 
C2 C3 C13 120.9(3) . . ? 
C4 C3 C13 119.9(3) . . ? 
C5 C4 C3 120.1(3) . . ? 
C5 C4 H4 119.9 . . ? 
C3 C4 H4 119.9 . . ? 
C6 C5 C4 119.0(3) . . ? 
C6 C5 C19 121.2(3) . . ? 
C4 C5 C19 119.8(3) . . ? 
C5 C6 C1 121.5(3) . . ? 
C5 C6 H6 119.3 . . ? 
C1 C6 H6 119.3 . . ? 
C8 C7 C12 118.9(3) . . ? 
C8 C7 C1 119.9(3) . . ? 
C12 C7 C1 121.2(3) . . ? 
C7 C8 C9 120.6(3) . . ? 
C7 C8 H8 119.7 . . ? 
C9 C8 H8 119.7 . . ? 
C10 C9 C8 120.7(3) . . ? 
C10 C9 H9 119.6 . . ? 
C8 C9 H9 119.6 . . ? 
C9 C10 C11 118.8(3) . . ? 
C9 C10 C25 119.8(3) . . ? 
C11 C10 C25 121.3(3) . . ? 
C12 C11 C10 120.2(3) . . ? 
C12 C11 H11 119.9 . . ? 
C10 C11 H11 119.9 . . ? 
C11 C12 C7 120.7(3) . . ? 
C11 C12 H12 119.7 . . ? 
C7 C12 H12 119.7 . . ? 
C18 C13 C14 117.8(3) . . ? 
C18 C13 C3 121.7(3) . . ? 
C14 C13 C3 120.4(3) . . ? 
C15 C14 C13 121.9(4) . . ? 
C15 C14 H14 119.1 . . ? 
C13 C14 H14 119.1 . . ? 
C14 C15 C16 119.5(3) . . ? 
C14 C15 H15 120.3 . . ? 
C16 C15 H15 120.3 . . ? 
C17 C16 C15 119.4(3) . . ? 
C17 C16 C26 121.4(3) . . ? 
C15 C16 C26 119.2(3) . . ? 
C16 C17 C18 121.0(3) . . ? 
C16 C17 H17 119.5 . . ? 
C18 C17 H17 119.5 . . ? 
C13 C18 C17 120.4(3) . . ? 
C13 C18 H18 119.8 . . ? 
C17 C18 H18 119.8 . . ? 
C20 C19 C24 118.8(4) . . ? 
C20 C19 C5 121.9(4) . . ? 
C24 C19 C5 119.3(3) . . ? 
C19 C20 C21 120.3(4) . . ? 
C19 C20 H20 119.9 . . ? 
C21 C20 H20 119.9 . . ? 
C22 C21 C20 119.1(3) . . ? 
C22 C21 H21 120.5 . . ? 
C20 C21 H21 120.5 . . ? 
C21 C22 C23 121.4(4) . . ? 
C21 C22 C27 119.1(4) . . ? 
C23 C22 C27 119.3(4) . . ? 
C22 C23 C24 119.0(4) . . ? 
C22 C23 H23 120.5 . . ? 
C24 C23 H23 120.5 . . ? 
C19 C24 C23 121.2(4) . . ? 
C19 C24 H24 119.4 . . ? 
C23 C24 H24 119.4 . . ? 
O2 C25 O1 125.9(3) . . ? 
O2 C25 C10 116.9(3) . . ? 
O1 C25 C10 117.2(3) . . ? 
O5 C26 O6 126.5(3) . . ? 
O5 C26 C16 116.1(3) . . ? 
O6 C26 C16 117.4(3) . . ? 
O4 C27 O3 124.8(4) . . ? 
O4 C27 C22 115.9(4) . . ? 
O3 C27 C22 119.2(4) . . ? 
C25 O1 Zn2 124.6(2) . . ? 
C25 O2 Zn1 135.4(2) . . ? 
C25 O2 Na2 152.4(2) . . ? 
Zn1 O2 Na2 45.74(8) . . ? 
C27 O4 Zn2 114.8(3) . 2_655 ? 
C26 O5 Zn1 134.4(2) . 2 ? 
C26 O5 Na2 168.1(3) . 2 ? 
Zn1 O5 Na2 45.34(8) 2 2 ? 
C26 O6 Zn2 116.1(2) . 2 ? 
Zn2 O7 Zn2 137.09(14) 7 . ? 
Zn2 O7 Zn1 103.85(7) 7 . ? 
Zn2 O7 Zn1 103.85(7) . . ? 
Zn2 O7 Na1 100.72(8) 7 . ? 
Zn2 O7 Na1 100.72(8) . . ? 
Zn1 O7 Na1 108.52(15) . . ? 
 
loop_ 
 _geom_torsion_atom_site_label_1 
 _geom_torsion_atom_site_label_2 
 _geom_torsion_atom_site_label_3 
 _geom_torsion_atom_site_label_4 
 _geom_torsion 
 _geom_torsion_site_symmetry_1 
 _geom_torsion_site_symmetry_2 
 _geom_torsion_site_symmetry_3 
 _geom_torsion_site_symmetry_4 
 _geom_torsion_publ_flag 
O4 Zn2 Na1 O7 -120.47(15) 2_654 . . . ? 
O6 Zn2 Na1 O7 16.4(2) 2_554 . . . ? 
O1 Zn2 Na1 O7 126.59(15) . . . . ? 
O4 Zn2 Na1 Na2 34.9(2) 2_654 . . 6_656 ? 
O6 Zn2 Na1 Na2 171.84(17) 2_554 . . 6_656 ? 
O1 Zn2 Na1 Na2 -78.00(18) . . . 6_656 ? 
O7 Zn2 Na1 Na2 155.4(3) . . . 6_656 ? 
O4 Zn2 Na1 Zn2 -98.55(10) 2_654 . . 7 ? 
O6 Zn2 Na1 Zn2 38.4(2) 2_554 . . 7 ? 
O1 Zn2 Na1 Zn2 148.52(9) . . . 7 ? 
O7 Zn2 Na1 Zn2 21.92(10) . . . 7 ? 
O2 Zn1 Na2 O2 94.04(14) 7 . . . ? 
O7 Zn1 Na2 O2 47.02(7) . . . . ? 
O5 Zn1 Na2 O2 -177.06(10) 8_655 . . . ? 
O5 Zn1 Na2 O2 -88.91(11) 2_554 . . . ? 
O2 Zn1 Na2 O2 -94.04(14) . . . 7 ? 
O7 Zn1 Na2 O2 -47.02(7) . . . 7 ? 
O5 Zn1 Na2 O2 88.91(11) 8_655 . . 7 ? 
O5 Zn1 Na2 O2 177.06(10) 2_554 . . 7 ? 
O2 Zn1 Na2 O5 177.06(10) . . . 8_655 ? 
O2 Zn1 Na2 O5 -88.91(11) 7 . . 8_655 ? 
O7 Zn1 Na2 O5 -135.92(8) . . . 8_655 ? 
O5 Zn1 Na2 O5 88.15(16) 2_554 . . 8_655 ? 
O2 Zn1 Na2 O5 88.91(11) . . . 2_554 ? 
O2 Zn1 Na2 O5 -177.06(10) 7 . . 2_554 ? 
O7 Zn1 Na2 O5 135.92(8) . . . 2_554 ? 
O5 Zn1 Na2 O5 -88.15(16) 8_655 . . 2_554 ? 
O2 Zn1 Na2 Na1 132.98(7) . . . 6_556 ? 
O2 Zn1 Na2 Na1 -132.98(7) 7 . . 6_556 ? 
O7 Zn1 Na2 Na1 180.000(1) . . . 6_556 ? 
O5 Zn1 Na2 Na1 -44.08(8) 8_655 . . 6_556 ? 
O5 Zn1 Na2 Na1 44.08(8) 2_554 . . 6_556 ? 
C6 C1 C2 C3 -0.8(7) . . . . ? 
C7 C1 C2 C3 176.5(4) . . . . ? 
C1 C2 C3 C4 0.4(7) . . . . ? 
C1 C2 C3 C13 -179.1(4) . . . . ? 
C2 C3 C4 C5 -2.3(7) . . . . ? 
C13 C3 C4 C5 177.2(4) . . . . ? 
C3 C4 C5 C6 4.6(7) . . . . ? 
C3 C4 C5 C19 -173.9(4) . . . . ? 
C4 C5 C6 C1 -5.1(7) . . . . ? 
C19 C5 C6 C1 173.4(4) . . . . ? 
C2 C1 C6 C5 3.2(7) . . . . ? 
C7 C1 C6 C5 -174.1(4) . . . . ? 
C2 C1 C7 C8 -37.8(6) . . . . ? 
C6 C1 C7 C8 139.5(4) . . . . ? 
C2 C1 C7 C12 140.4(4) . . . . ? 
C6 C1 C7 C12 -42.3(6) . . . . ? 
C12 C7 C8 C9 4.0(6) . . . . ? 
C1 C7 C8 C9 -177.7(4) . . . . ? 
C7 C8 C9 C10 -2.5(6) . . . . ? 
C8 C9 C10 C11 -0.1(6) . . . . ? 
C8 C9 C10 C25 179.2(3) . . . . ? 
C9 C10 C11 C12 1.1(6) . . . . ? 
C25 C10 C11 C12 -178.1(3) . . . . ? 
C10 C11 C12 C7 0.5(6) . . . . ? 
C8 C7 C12 C11 -3.0(6) . . . . ? 
C1 C7 C12 C11 178.7(4) . . . . ? 
C2 C3 C13 C18 148.8(5) . . . . ? 
C4 C3 C13 C18 -30.7(7) . . . . ? 
C2 C3 C13 C14 -28.5(7) . . . . ? 
C4 C3 C13 C14 152.0(5) . . . . ? 
C18 C13 C14 C15 0.4(8) . . . . ? 
C3 C13 C14 C15 177.9(5) . . . . ? 
C13 C14 C15 C16 -0.4(8) . . . . ? 
C14 C15 C16 C17 0.8(7) . . . . ? 
C14 C15 C16 C26 -179.9(4) . . . . ? 
C15 C16 C17 C18 -1.3(6) . . . . ? 
C26 C16 C17 C18 179.4(4) . . . . ? 
C14 C13 C18 C17 -1.0(7) . . . . ? 
C3 C13 C18 C17 -178.4(4) . . . . ? 
C16 C17 C18 C13 1.4(7) . . . . ? 
C6 C5 C19 C20 143.3(4) . . . . ? 
C4 C5 C19 C20 -38.3(7) . . . . ? 
C6 C5 C19 C24 -36.4(7) . . . . ? 
C4 C5 C19 C24 142.1(5) . . . . ? 
C24 C19 C20 C21 -2.1(7) . . . . ? 
C5 C19 C20 C21 178.2(4) . . . . ? 
C19 C20 C21 C22 2.5(6) . . . . ? 
C20 C21 C22 C23 -3.4(7) . . . . ? 
C20 C21 C22 C27 -178.9(4) . . . . ? 
C21 C22 C23 C24 4.0(7) . . . . ? 
C27 C22 C23 C24 179.5(4) . . . . ? 
C20 C19 C24 C23 2.8(8) . . . . ? 
C5 C19 C24 C23 -177.6(5) . . . . ? 
C22 C23 C24 C19 -3.7(8) . . . . ? 
C9 C10 C25 O2 -15.2(5) . . . . ? 
C11 C10 C25 O2 164.0(3) . . . . ? 
C9 C10 C25 O1 163.6(3) . . . . ? 
C11 C10 C25 O1 -17.2(5) . . . . ? 
C17 C16 C26 O5 16.4(6) . . . . ? 
C15 C16 C26 O5 -162.9(4) . . . . ? 
C17 C16 C26 O6 -161.2(4) . . . . ? 
C15 C16 C26 O6 19.5(6) . . . . ? 
C21 C22 C27 O4 -3.6(6) . . . . ? 
C23 C22 C27 O4 -179.2(4) . . . . ? 
C21 C22 C27 O3 174.5(5) . . . . ? 
C23 C22 C27 O3 -1.1(7) . . . . ? 
O2 C25 O1 Zn2 -2.4(5) . . . . ? 
C10 C25 O1 Zn2 179.0(2) . . . . ? 
O4 Zn2 O1 C25 -140.1(3) 2_654 . . . ? 
O6 Zn2 O1 C25 86.0(3) 2_554 . . . ? 
O7 Zn2 O1 C25 -27.5(3) . . . . ? 
Na1 Zn2 O1 C25 -64.0(3) . . . . ? 
O1 C25 O2 Zn1 -9.3(5) . . . . ? 
C10 C25 O2 Zn1 169.4(2) . . . . ? 
O1 C25 O2 Na2 -87.5(5) . . . . ? 
C10 C25 O2 Na2 91.2(5) . . . . ? 
Na2 Zn1 O2 C25 -140.7(3) . . . . ? 
O2 Zn1 O2 C25 131.6(3) 7 . . . ? 
O7 Zn1 O2 C25 43.1(3) . . . . ? 
O5 Zn1 O2 C25 -107.1(10) 8_655 . . . ? 
O5 Zn1 O2 C25 -52.9(3) 2_554 . . . ? 
O2 Zn1 O2 Na2 -87.69(11) 7 . . . ? 
O7 Zn1 O2 Na2 -176.20(10) . . . . ? 
O5 Zn1 O2 Na2 33.6(10) 8_655 . . . ? 
O5 Zn1 O2 Na2 87.76(10) 2_554 . . . ? 
Zn1 Na2 O2 C25 106.5(4) . . . . ? 
O2 Na2 O2 C25 160.0(4) 7 . . . ? 
O5 Na2 O2 C25 104.3(4) 8_655 . . . ? 
O5 Na2 O2 C25 50.1(4) 2_554 . . . ? 
Na1 Na2 O2 C25 -59.1(5) 6_556 . . . ? 
O2 Na2 O2 Zn1 53.50(7) 7 . . . ? 
O5 Na2 O2 Zn1 -2.15(8) 8_655 . . . ? 
O5 Na2 O2 Zn1 -56.43(9) 2_554 . . . ? 
Na1 Na2 O2 Zn1 -165.6(3) 6_556 . . . ? 
O3 C27 O4 Zn2 -2.4(7) . . . 2_655 ? 
C22 C27 O4 Zn2 175.7(3) . . . 2_655 ? 
O6 C26 O5 Zn1 -36.0(6) . . . 2 ? 
C16 C26 O5 Zn1 146.6(3) . . . 2 ? 
O6 C26 O5 Na2 -118.8(9) . . . 2 ? 
C16 C26 O5 Na2 63.9(11) . . . 2 ? 
O5 C26 O6 Zn2 -8.3(5) . . . 2 ? 
C16 C26 O6 Zn2 169.0(2) . . . 2 ? 
O4 Zn2 O7 Zn2 -55.6(2) 2_654 . . 7 ? 
O6 Zn2 O7 Zn2 69.35(19) 2_554 . . 7 ? 
O1 Zn2 O7 Zn2 -170.54(17) . . . 7 ? 
Na1 Zn2 O7 Zn2 -118.8(2) . . . 7 ? 
O4 Zn2 O7 Zn1 175.48(11) 2_654 . . . ? 
O6 Zn2 O7 Zn1 -59.53(12) 2_554 . . . ? 
O1 Zn2 O7 Zn1 60.58(12) . . . . ? 
Na1 Zn2 O7 Zn1 112.31(16) . . . . ? 
O4 Zn2 O7 Na1 63.16(15) 2_654 . . . ? 
O6 Zn2 O7 Na1 -171.84(13) 2_554 . . . ? 
O1 Zn2 O7 Na1 -51.73(14) . . . . ? 
Na2 Zn1 O7 Zn2 106.54(9) . . . 7 ? 
O2 Zn1 O7 Zn2 153.54(11) . . . 7 ? 
O2 Zn1 O7 Zn2 59.55(11) 7 . . 7 ? 
O5 Zn1 O7 Zn2 -29.12(12) 8_655 . . 7 ? 
O5 Zn1 O7 Zn2 -117.79(11) 2_554 . . 7 ? 
Na2 Zn1 O7 Zn2 -106.54(9) . . . . ? 
O2 Zn1 O7 Zn2 -59.55(11) . . . . ? 
O2 Zn1 O7 Zn2 -153.54(11) 7 . . . ? 
O5 Zn1 O7 Zn2 117.79(11) 8_655 . . . ? 
O5 Zn1 O7 Zn2 29.12(12) 2_554 . . . ? 
Na2 Zn1 O7 Na1 0.0 . . . . ? 
O2 Zn1 O7 Na1 46.99(7) . . . . ? 
O2 Zn1 O7 Na1 -46.99(7) 7 . . . ? 
O5 Zn1 O7 Na1 -135.66(8) 8_655 . . . ? 
O5 Zn1 O7 Na1 135.66(8) 2_554 . . . ? 
Na2 Na1 O7 Zn2 71.31(8) 6_656 . . 7 ? 
Zn2 Na1 O7 Zn2 142.62(16) . . . 7 ? 
Na2 Na1 O7 Zn2 -71.31(8) 6_656 . . . ? 
Zn2 Na1 O7 Zn2 -142.62(16) 7 . . . ? 
Na2 Na1 O7 Zn1 180.0 6_656 . . . ? 
Zn2 Na1 O7 Zn1 108.69(8) 7 . . . ? 
Zn2 Na1 O7 Zn1 -108.69(8) . . . . ? 
 
_diffrn_measured_fraction_theta_max    1.000 
_diffrn_reflns_theta_full              25.20 
_diffrn_measured_fraction_theta_full   1.000 
_refine_diff_density_max    0.651 
_refine_diff_density_min   -0.780 
_refine_diff_density_rms    0.077 

 
data_2_Squeeze 
 
_audit_creation_method            SHELXL-97 
_chemical_name_systematic 
; 
 ? 
; 
_chemical_name_common             ? 
_chemical_melting_point           ? 
_chemical_formula_moiety          ? 
_chemical_formula_sum 
 'C55 H31 K3 O14 Zn2' 
_chemical_formula_weight          1163.84 
 
loop_ 
 _atom_type_symbol 
 _atom_type_description 
 _atom_type_scat_dispersion_real 
 _atom_type_scat_dispersion_imag 
 _atom_type_scat_source 
 'C'  'C'   0.0033   0.0016 
 'International Tables Vol C Tables 4.2.6.8 and 6.1.1.4' 
 'H'  'H'   0.0000   0.0000 
 'International Tables Vol C Tables 4.2.6.8 and 6.1.1.4' 
 'O'  'O'   0.0106   0.0060 
 'International Tables Vol C Tables 4.2.6.8 and 6.1.1.4' 
 'Zn'  'Zn'   0.2839   1.4301 
 'International Tables Vol C Tables 4.2.6.8 and 6.1.1.4' 
 'K'  'K'   0.2009   0.2494 
 'International Tables Vol C Tables 4.2.6.8 and 6.1.1.4' 
 
_symmetry_cell_setting            Triclinic 
_symmetry_space_group_name_H-M    P-1 
 
loop_ 
 _symmetry_equiv_pos_as_xyz 
 'x, y, z' 
 '-x, -y, -z' 
 
_cell_length_a                    16.3656(18) 
_cell_length_b                    17.979(2) 
_cell_length_c                    19.232(2) 
_cell_angle_alpha                 65.452(2) 
_cell_angle_beta                  66.275(2) 
_cell_angle_gamma                 69.154(2) 
_cell_volume                      4589.5(9) 
_cell_formula_units_Z             2 
_cell_measurement_temperature     293(2) 
_cell_measurement_reflns_used     1045 
_cell_measurement_theta_min       3.20
_cell_measurement_theta_max       27.46 
 
_exptl_crystal_description        block 
_exptl_crystal_colour             colorless
_exptl_crystal_size_max           0.22
_exptl_crystal_size_mid           0.20 
_exptl_crystal_size_min           0.20
_exptl_crystal_density_meas       none
_exptl_crystal_density_diffrn     0.842 
_exptl_crystal_density_method     'not measured' 
_exptl_crystal_F_000              1180 
_exptl_absorpt_coefficient_mu     0.696 
_exptl_absorpt_correction_type    multi-scan
_exptl_absorpt_correction_T_min   0.85632
_exptl_absorpt_correction_T_max   1.00000
_exptl_absorpt_process_details    sadabs
 
_exptl_special_details 
; 
 ? 
; 
 
_diffrn_ambient_temperature       293(2) 
_diffrn_radiation_wavelength      0.71073 
_diffrn_radiation_type            MoK\a 
_diffrn_radiation_source          'fine-focus sealed tube' 
_diffrn_radiation_monochromator   graphite 
_diffrn_measurement_device_type   ? 
_diffrn_measurement_method        ? 
_diffrn_detector_area_resol_mean  ? 
_diffrn_standards_number          ? 
_diffrn_standards_interval_count  ? 
_diffrn_standards_interval_time   ? 
_diffrn_standards_decay_%         ? 
_diffrn_reflns_number             49756 
_diffrn_reflns_av_R_equivalents   0.0539 
_diffrn_reflns_av_sigmaI/netI     0.0704 
_diffrn_reflns_limit_h_min        -19 
_diffrn_reflns_limit_h_max        19 
_diffrn_reflns_limit_k_min        -21 
_diffrn_reflns_limit_k_max        21 
_diffrn_reflns_limit_l_min        -23 
_diffrn_reflns_limit_l_max        23 
_diffrn_reflns_theta_min          1.28 
_diffrn_reflns_theta_max          25.20 
_reflns_number_total              16523 
_reflns_number_gt                 10609 
_reflns_threshold_expression      >2sigma(I) 
 
_computing_data_collection        ? 
_computing_cell_refinement        ? 
_computing_data_reduction         ? 
_computing_structure_solution     'SHELXS-97 (Sheldrick, 1990)' 
_computing_structure_refinement   'SHELXL-97 (Sheldrick, 1997)' 
_computing_molecular_graphics     ? 
_computing_publication_material   ? 
 
_refine_special_details 
; 
 Refinement of F^2^ against ALL reflections.  The weighted R-factor wR and 
 goodness of fit S are based on F^2^, conventional R-factors R are based 
 on F, with F set to zero for negative F^2^. The threshold expression of 
 F^2^ > 2sigma(F^2^) is used only for calculating R-factors(gt) etc. and is 
 not relevant to the choice of reflections for refinement.  R-factors based 
 on F^2^ are statistically about twice as large as those based on F, and R- 
 factors based on ALL data will be even larger. 
; 
 
_refine_ls_structure_factor_coef  Fsqd  
_refine_ls_matrix_type            full 
_refine_ls_weighting_scheme       calc  
_refine_ls_weighting_details 
 'calc w=1/[\s^2^(Fo^2^)+(0.0877P)^2^+0.0000P] where P=(Fo^2^+2Fc^2^)/3' 
_atom_sites_solution_primary      direct 
_atom_sites_solution_secondary    difmap 
_atom_sites_solution_hydrogens    geom 
_refine_ls_hydrogen_treatment     constr 
_refine_ls_extinction_method      none 
_refine_ls_extinction_coef        ? 
_refine_ls_number_reflns          16523 
_refine_ls_number_parameters      667 
_refine_ls_number_restraints      0 
_refine_ls_R_factor_all           0.0727 
_refine_ls_R_factor_gt            0.0521 
_refine_ls_wR_factor_ref          0.1451 
_refine_ls_wR_factor_gt           0.1381 
_refine_ls_goodness_of_fit_ref    0.909 
_refine_ls_restrained_S_all       0.909 
_refine_ls_shift/su_max           0.001 
_refine_ls_shift/su_mean          0.000 
 
loop_ 
 _atom_site_label 
 _atom_site_type_symbol 
 _atom_site_fract_x 
 _atom_site_fract_y 
 _atom_site_fract_z 
 _atom_site_U_iso_or_equiv 
 _atom_site_adp_type 
 _atom_site_occupancy 
 _atom_site_symmetry_multiplicity 
 _atom_site_calc_flag 
 _atom_site_refinement_flags 
 _atom_site_disorder_assembly 
 _atom_site_disorder_group 
Zn1 Zn 1.61535(2) 0.20147(3) -0.03474(2) 0.03603(12) Uani 1 1 d . . . 
Zn2 Zn 0.64495(2) 0.96421(2) 0.22758(2) 0.03633(12) Uani 1 1 d . . . 
K1 K 1.82121(5) 0.05259(5) 0.03314(5) 0.04088(19) Uani 1 1 d . . . 
K2 K 1.60369(5) 0.19430(5) 0.16965(5) 0.0423(2) Uani 1 1 d . . . 
K3 K 1.9981(3) -0.0653(3) -0.0461(3) 0.390(3) Uani 1 1 d . . . 
C1 C 1.0502(2) 0.3945(2) 0.1049(2) 0.0341(7) Uani 1 1 d . . . 
C2 C 1.0120(2) 0.4675(2) 0.1256(2) 0.0366(8) Uani 1 1 d . . . 
H2 H 1.0473 0.4880 0.1381 0.044 Uiso 1 1 calc R . . 
C3 C 0.92144(19) 0.5110(2) 0.12824(19) 0.0328(7) Uani 1 1 d . . . 
C4 C 0.87026(19) 0.4781(2) 0.1092(2) 0.0341(8) Uani 1 1 d . . . 
H4 H 0.8099 0.5061 0.1107 0.041 Uiso 1 1 calc R . . 
C5 C 0.90687(19) 0.40472(19) 0.08822(19) 0.0324(7) Uani 1 1 d . . . 
C6 C 0.9981(2) 0.3628(2) 0.0871(2) 0.0362(8) Uani 1 1 d . . . 
H6 H 1.0236 0.3133 0.0741 0.043 Uiso 1 1 calc R . . 
C7 C 1.1504(2) 0.3553(2) 0.0938(2) 0.0355(8) Uani 1 1 d . . . 
C8 C 1.1940(2) 0.3507(2) 0.1453(2) 0.0474(10) Uani 1 1 d . . . 
H8 H 1.1598 0.3674 0.1905 0.057 Uiso 1 1 calc R . . 
C9 C 1.2888(2) 0.3210(2) 0.1290(2) 0.0492(10) Uani 1 1 d . . . 
H9 H 1.3170 0.3167 0.1645 0.059 Uiso 1 1 calc R . . 
C10 C 1.3412(2) 0.2982(2) 0.0615(2) 0.0365(8) Uani 1 1 d . . . 
C11 C 1.2976(2) 0.3016(2) 0.0105(2) 0.0346(8) Uani 1 1 d . . . 
H11 H 1.3323 0.2854 -0.0349 0.042 Uiso 1 1 calc R . . 
C12 C 1.2039(2) 0.32880(19) 0.0270(2) 0.0338(7) Uani 1 1 d . . . 
H12 H 1.1758 0.3295 -0.0068 0.041 Uiso 1 1 calc R . . 
C13 C 0.8829(2) 0.5920(2) 0.1434(2) 0.0337(7) Uani 1 1 d . . . 
C14 C 0.7901(2) 0.6148(2) 0.1858(2) 0.0374(8) Uani 1 1 d . . . 
H14 H 0.7530 0.5768 0.2079 0.045 Uiso 1 1 calc R . . 
C15 C 0.7537(2) 0.6941(2) 0.1948(2) 0.0389(8) Uani 1 1 d . . . 
H15 H 0.6924 0.7081 0.2237 0.047 Uiso 1 1 calc R . . 
C16 C 0.8067(2) 0.7525(2) 0.1617(2) 0.0353(8) Uani 1 1 d . . . 
C17 C 0.8984(2) 0.7298(2) 0.1202(2) 0.0392(8) Uani 1 1 d . . . 
H17 H 0.9351 0.7685 0.0973 0.047 Uiso 1 1 calc R . . 
C18 C 0.9363(2) 0.6500(2) 0.1125(2) 0.0368(8) Uani 1 1 d . . . 
H18 H 0.9984 0.6353 0.0863 0.044 Uiso 1 1 calc R . . 
C19 C 0.85380(19) 0.3752(2) 0.06209(19) 0.0320(7) Uani 1 1 d . . . 
C20 C 0.8624(2) 0.2903(2) 0.0786(2) 0.0354(8) Uani 1 1 d . . . 
H20 H 0.9019 0.2508 0.1075 0.043 Uiso 1 1 calc R . . 
C21 C 0.8136(2) 0.2636(2) 0.0531(2) 0.0378(8) Uani 1 1 d . . . 
H21 H 0.8185 0.2064 0.0670 0.045 Uiso 1 1 calc R . . 
C22 C 0.7567(2) 0.3215(2) 0.0064(2) 0.0351(8) Uani 1 1 d . . . 
C23 C 0.7491(2) 0.4058(2) -0.0109(2) 0.0389(8) Uani 1 1 d . . . 
H23 H 0.7119 0.4454 -0.0419 0.047 Uiso 1 1 calc R . . 
C24 C 0.7958(2) 0.4326(2) 0.0170(2) 0.0375(8) Uani 1 1 d . . . 
H24 H 0.7883 0.4898 0.0055 0.045 Uiso 1 1 calc R . . 
C25 C 0.7663(2) 0.8390(2) 0.1687(2) 0.0393(8) Uani 1 1 d . . . 
C26 C 1.4434(2) 0.2689(2) 0.0430(2) 0.0418(9) Uani 1 1 d . . . 
C27 C 0.7040(2) 0.2942(2) -0.0234(2) 0.0375(8) Uani 1 1 d . . . 
C28 C 0.0758(2) 1.1071(3) 0.4151(2) 0.0529(10) Uani 1 1 d . . . 
C29 C 0.0267(2) 1.0959(3) 0.3779(2) 0.0518(10) Uani 1 1 d . . . 
H29 H 0.0576 1.0834 0.3302 0.062 Uiso 1 1 calc R . . 
C30 C -0.0677(2) 1.1027(3) 0.4093(2) 0.0495(10) Uani 1 1 d . . . 
C31 C -0.1124(2) 1.1229(3) 0.4807(2) 0.0509(10) Uani 1 1 d . . . 
H31 H -0.1758 1.1306 0.5012 0.061 Uiso 1 1 calc R . . 
C32 C -0.0650(2) 1.1318(3) 0.5217(2) 0.0494(10) Uani 1 1 d . . . 
C33 C 0.0291(2) 1.1250(3) 0.4874(2) 0.0528(10) Uani 1 1 d . . . 
H33 H 0.0617 1.1326 0.5130 0.063 Uiso 1 1 calc R . . 
C34 C 0.1774(2) 1.0925(3) 0.3833(2) 0.0517(10) Uani 1 1 d . . . 
C35 C 0.2277(2) 1.0261(2) 0.3527(2) 0.0457(9) Uani 1 1 d . . . 
H35 H 0.1969 0.9933 0.3498 0.055 Uiso 1 1 calc R . . 
C36 C 0.3221(2) 1.0080(2) 0.3268(2) 0.0424(9) Uani 1 1 d . . . 
H36 H 0.3543 0.9629 0.3073 0.051 Uiso 1 1 calc R . . 
C37 C 0.3694(2) 1.0567(2) 0.3295(2) 0.0446(9) Uani 1 1 d . . . 
C38 C 0.3200(2) 1.1247(3) 0.3580(3) 0.0596(11) Uani 1 1 d . . . 
H38 H 0.3508 1.1590 0.3585 0.072 Uiso 1 1 calc R . . 
C39 C 0.2251(2) 1.1413(3) 0.3857(3) 0.0661(13) Uani 1 1 d . . . 
H39 H 0.1929 1.1858 0.4062 0.079 Uiso 1 1 calc R . . 
C40 C -0.1180(2) 1.0861(3) 0.3703(2) 0.0463(9) Uani 1 1 d . . . 
C41 C -0.0909(2) 1.1047(2) 0.2874(2) 0.0470(9) Uani 1 1 d . . . 
H41 H -0.0431 1.1319 0.2555 0.056 Uiso 1 1 calc R . . 
C42 C -0.1337(2) 1.0835(2) 0.2520(2) 0.0445(9) Uani 1 1 d . . . 
H42 H -0.1157 1.0978 0.1965 0.053 Uiso 1 1 calc R . . 
C43 C -0.2035(2) 1.0410(2) 0.2982(2) 0.0412(9) Uani 1 1 d . . . 
C44 C -0.2304(2) 1.0204(3) 0.3813(2) 0.0503(10) Uani 1 1 d . . . 
H44 H -0.2769 0.9915 0.4131 0.060 Uiso 1 1 calc R . . 
C45 C -0.1879(2) 1.0431(3) 0.4167(2) 0.0518(10) Uani 1 1 d . . . 
H45 H -0.2064 1.0293 0.4721 0.062 Uiso 1 1 calc R . . 
C46 C -0.1131(2) 1.1410(3) 0.6023(2) 0.0476(10) Uani 1 1 d . . . 
C47 C -0.2017(2) 1.1892(3) 0.6222(2) 0.0538(11) Uani 1 1 d . . . 
H47 H -0.2311 1.2195 0.5829 0.065 Uiso 1 1 calc R . . 
C48 C -0.2469(2) 1.1931(3) 0.6991(2) 0.0509(10) Uani 1 1 d . . . 
H48 H -0.3051 1.2276 0.7104 0.061 Uiso 1 1 calc R . . 
C49 C -0.2061(2) 1.1463(2) 0.7595(2) 0.0458(9) Uani 1 1 d . . . 
C50 C -0.1172(2) 1.0973(3) 0.7410(2) 0.0501(10) Uani 1 1 d . . . 
H50 H -0.0889 1.0654 0.7809 0.060 Uiso 1 1 calc R . . 
C51 C -0.0717(2) 1.0962(3) 0.6636(2) 0.0530(11) Uani 1 1 d . . . 
H51 H -0.0118 1.0649 0.6516 0.064 Uiso 1 1 calc R . . 
C52 C 0.4723(2) 1.0392(2) 0.2996(2) 0.0437(9) Uani 1 1 d . . . 
C53 C -0.2504(3) 1.0208(3) 0.2586(3) 0.0504(10) Uani 1 1 d . . . 
C54 C -0.2540(2) 1.1473(3) 0.8444(2) 0.0464(10) Uani 1 1 d . . . 
C55 C 0.5802(2) 1.0471(2) 0.0885(3) 0.0475(9) Uani 1 1 d . . . 
H55 H 0.5453 1.0068 0.1174 0.057 Uiso 1 1 calc R . . 
O1 O 1.47874(15) 0.24767(18) 0.09677(16) 0.0554(7) Uani 1 1 d . . . 
O2 O 1.48859(14) 0.26697(16) -0.02809(15) 0.0474(6) Uani 1 1 d . . . 
O3 O 0.81096(16) 0.89403(15) 0.12933(16) 0.0492(6) Uani 1 1 d . . . 
O4 O 0.68522(15) 0.85120(15) 0.21726(15) 0.0469(6) Uani 1 1 d . . . 
O5 O 0.69703(13) 0.21643(14) 0.00905(13) 0.0348(5) Uani 1 1 d . . . 
O6 O 0.66738(18) 0.34528(16) -0.07475(16) 0.0536(7) Uani 1 1 d . . . 
O7 O 0.51261(14) 0.96962(16) 0.28293(15) 0.0484(6) Uani 1 1 d . . . 
O8 O 0.51295(15) 1.08988(16) 0.29155(16) 0.0511(6) Uani 1 1 d . . . 
O9 O -0.24695(17) 1.06199(18) 0.18686(17) 0.0593(8) Uani 1 1 d . . . 
O10 O -0.29329(17) 0.96250(18) 0.29957(17) 0.0561(7) Uani 1 1 d . . . 
O11 O -0.22276(16) 1.09655(18) 0.89940(15) 0.0522(7) Uani 1 1 d . . . 
O12 O -0.32930(15) 1.20418(17) 0.85325(15) 0.0497(6) Uani 1 1 d . . . 
O13 O 0.63363(14) 1.04855(15) 0.11955(14) 0.0415(6) Uani 1 1 d . . . 
O14 O 0.56989(16) 1.09481(16) 0.02239(16) 0.0477(6) Uani 1 1 d . . . 
 
loop_ 
 _atom_site_aniso_label 
 _atom_site_aniso_U_11 
 _atom_site_aniso_U_22 
 _atom_site_aniso_U_33 
 _atom_site_aniso_U_23 
 _atom_site_aniso_U_13 
 _atom_site_aniso_U_12 
Zn1 0.01691(18) 0.0589(3) 0.0481(2) -0.0385(2) -0.00926(16) -0.00097(16) 
Zn2 0.02103(19) 0.0473(2) 0.0528(3) -0.0351(2) -0.00771(17) -0.00201(16) 
K1 0.0316(4) 0.0490(5) 0.0536(5) -0.0310(4) -0.0123(3) -0.0050(3) 
K2 0.0312(4) 0.0545(5) 0.0512(5) -0.0279(4) -0.0158(3) -0.0036(3) 
K3 0.380(6) 0.307(5) 0.436(6) -0.221(5) 0.098(5) -0.156(4) 
C1 0.0216(15) 0.0444(19) 0.048(2) -0.0291(17) -0.0094(14) -0.0045(14) 
C2 0.0200(15) 0.053(2) 0.053(2) -0.0334(18) -0.0100(15) -0.0073(14) 
C3 0.0221(15) 0.0407(19) 0.047(2) -0.0302(16) -0.0071(14) -0.0039(14) 
C4 0.0131(14) 0.0417(19) 0.057(2) -0.0309(17) -0.0114(14) 0.0033(13) 
C5 0.0202(15) 0.0378(18) 0.047(2) -0.0261(16) -0.0064(14) -0.0042(13) 
C6 0.0202(15) 0.0401(19) 0.060(2) -0.0317(18) -0.0141(15) 0.0015(14) 
C7 0.0232(15) 0.045(2) 0.051(2) -0.0324(17) -0.0113(15) -0.0012(14) 
C8 0.0187(16) 0.082(3) 0.062(2) -0.054(2) -0.0140(16) 0.0049(17) 
C9 0.0287(17) 0.077(3) 0.062(2) -0.047(2) -0.0181(17) -0.0001(18) 
C10 0.0198(15) 0.051(2) 0.050(2) -0.0308(18) -0.0129(14) 0.0000(14) 
C11 0.0214(15) 0.0434(19) 0.047(2) -0.0299(17) -0.0121(14) 0.0042(14) 
C12 0.0250(16) 0.0397(19) 0.050(2) -0.0259(16) -0.0163(15) -0.0020(14) 
C13 0.0246(15) 0.0385(19) 0.049(2) -0.0284(17) -0.0104(14) -0.0032(14) 
C14 0.0201(15) 0.044(2) 0.060(2) -0.0352(18) -0.0069(15) -0.0048(14) 
C15 0.0164(15) 0.052(2) 0.061(2) -0.0402(19) -0.0061(15) -0.0005(14) 
C16 0.0244(16) 0.048(2) 0.050(2) -0.0337(17) -0.0104(15) -0.0057(15) 
C17 0.0282(17) 0.044(2) 0.054(2) -0.0283(18) -0.0073(16) -0.0092(15) 
C18 0.0164(15) 0.053(2) 0.055(2) -0.0378(18) -0.0070(14) -0.0025(14) 
C19 0.0197(15) 0.0378(19) 0.048(2) -0.0272(16) -0.0080(14) -0.0030(13) 
C20 0.0229(15) 0.042(2) 0.051(2) -0.0235(17) -0.0151(15) -0.0028(14) 
C21 0.0269(16) 0.0386(19) 0.057(2) -0.0261(17) -0.0143(16) -0.0030(14) 
C22 0.0206(15) 0.044(2) 0.051(2) -0.0276(17) -0.0121(15) -0.0013(14) 
C23 0.0302(17) 0.042(2) 0.055(2) -0.0246(18) -0.0204(16) -0.0008(15) 
C24 0.0292(17) 0.0349(18) 0.058(2) -0.0222(17) -0.0193(16) -0.0018(14) 
C25 0.0317(18) 0.042(2) 0.059(2) -0.0326(19) -0.0195(17) 0.0031(16) 
C26 0.0231(16) 0.056(2) 0.061(2) -0.036(2) -0.0143(17) -0.0022(15) 
C27 0.0227(16) 0.054(2) 0.048(2) -0.0331(19) -0.0112(15) -0.0022(16) 
C28 0.0231(17) 0.093(3) 0.060(2) -0.053(2) -0.0098(16) -0.0012(18) 
C29 0.0225(17) 0.097(3) 0.053(2) -0.054(2) -0.0034(16) -0.0052(18) 
C30 0.0236(17) 0.084(3) 0.056(2) -0.044(2) -0.0101(16) -0.0044(18) 
C31 0.0202(16) 0.094(3) 0.055(2) -0.051(2) -0.0071(16) -0.0024(18) 
C32 0.0223(16) 0.088(3) 0.056(2) -0.050(2) -0.0102(16) -0.0016(17) 
C33 0.0221(17) 0.093(3) 0.064(2) -0.057(2) -0.0120(17) 0.0009(18) 
C34 0.0215(17) 0.096(3) 0.053(2) -0.050(2) -0.0048(16) -0.0068(18) 
C35 0.0249(17) 0.082(3) 0.045(2) -0.039(2) -0.0066(15) -0.0104(17) 
C36 0.0274(17) 0.064(2) 0.042(2) -0.0349(19) -0.0059(15) -0.0003(16) 
C37 0.0237(17) 0.066(2) 0.050(2) -0.034(2) -0.0041(15) -0.0060(16) 
C38 0.0271(18) 0.088(3) 0.086(3) -0.062(3) -0.0052(19) -0.0093(19) 
C39 0.0273(19) 0.101(3) 0.092(3) -0.071(3) -0.010(2) 0.000(2) 
C40 0.0237(17) 0.082(3) 0.048(2) -0.042(2) -0.0105(16) -0.0020(17) 
C41 0.0291(18) 0.075(3) 0.045(2) -0.035(2) -0.0100(16) -0.0025(17) 
C42 0.0339(19) 0.060(2) 0.045(2) -0.0353(19) -0.0158(16) 0.0093(17) 
C43 0.0261(17) 0.063(2) 0.048(2) -0.0418(19) -0.0155(16) 0.0092(16) 
C44 0.0240(17) 0.078(3) 0.063(3) -0.044(2) -0.0131(17) -0.0005(17) 
C45 0.0278(18) 0.094(3) 0.047(2) -0.044(2) -0.0114(16) -0.0030(19) 
C46 0.0174(15) 0.085(3) 0.061(2) -0.054(2) -0.0085(16) -0.0016(17) 
C47 0.0219(17) 0.098(3) 0.054(2) -0.046(2) -0.0119(16) -0.0011(19) 
C48 0.0195(16) 0.091(3) 0.061(2) -0.052(2) -0.0106(16) -0.0010(18) 
C49 0.0247(17) 0.077(3) 0.057(2) -0.049(2) -0.0064(16) -0.0091(17) 
C50 0.0245(17) 0.089(3) 0.060(2) -0.055(2) -0.0145(16) 0.0016(18) 
C51 0.0235(17) 0.092(3) 0.063(2) -0.057(2) -0.0124(17) 0.0035(18) 
C52 0.0255(17) 0.062(2) 0.044(2) -0.0271(19) -0.0039(15) -0.0058(17) 
C53 0.035(2) 0.062(3) 0.075(3) -0.054(2) -0.025(2) 0.0149(19) 
C54 0.0250(18) 0.076(3) 0.059(2) -0.049(2) -0.0053(17) -0.0105(18) 
C55 0.0356(19) 0.057(2) 0.067(3) -0.038(2) -0.0104(19) -0.0136(18) 
O1 0.0240(12) 0.091(2) 0.0661(17) -0.0465(16) -0.0204(12) 0.0037(12) 
O2 0.0222(11) 0.0702(17) 0.0565(16) -0.0382(14) -0.0099(11) 0.0015(11) 
O3 0.0337(13) 0.0439(15) 0.0781(18) -0.0360(14) -0.0107(13) -0.0049(11) 
O4 0.0277(12) 0.0533(15) 0.0711(17) -0.0435(14) -0.0072(12) -0.0022(11) 
O5 0.0224(11) 0.0452(14) 0.0516(14) -0.0334(12) -0.0105(10) -0.0029(10) 
O6 0.0596(16) 0.0544(16) 0.0689(18) -0.0217(14) -0.0389(15) -0.0124(13) 
O7 0.0241(12) 0.0613(16) 0.0643(17) -0.0377(14) -0.0036(11) -0.0044(11) 
O8 0.0247(12) 0.0652(17) 0.0681(18) -0.0352(14) -0.0053(12) -0.0087(12) 
O9 0.0485(15) 0.082(2) 0.0698(19) -0.0568(17) -0.0333(14) 0.0174(14) 
O10 0.0377(14) 0.0756(19) 0.080(2) -0.0552(17) -0.0241(14) 0.0040(14) 
O11 0.0414(14) 0.0824(19) 0.0488(15) -0.0421(15) -0.0146(13) -0.0050(13) 
O12 0.0256(12) 0.0800(18) 0.0612(16) -0.0501(15) -0.0078(11) -0.0044(12) 
O13 0.0205(11) 0.0546(14) 0.0590(15) -0.0353(13) -0.0086(10) -0.0024(10) 
O14 0.0427(14) 0.0612(17) 0.0560(17) -0.0288(14) -0.0184(13) -0.0141(12) 
 
_geom_special_details 
; 
 All esds (except the esd in the dihedral angle between two l.s. planes) 
 are estimated using the full covariance matrix.  The cell esds are taken 
 into account individually in the estimation of esds in distances, angles 
 and torsion angles; correlations between esds in cell parameters are only 
 used when they are defined by crystal symmetry.  An approximate (isotropic) 
 treatment of cell esds is used for estimating esds involving l.s. planes. 
; 
 
loop_ 
 _geom_bond_atom_site_label_1 
 _geom_bond_atom_site_label_2 
 _geom_bond_distance 
 _geom_bond_site_symmetry_2 
 _geom_bond_publ_flag 
Zn1 O12 1.959(2) 1_744 ? 
Zn1 O2 1.970(2) . ? 
Zn1 O5 1.979(2) 1_655 ? 
Zn1 O14 2.011(3) 1_645 ? 
Zn1 K1 3.7995(9) . ? 
Zn1 K2 3.8075(9) . ? 
Zn2 O4 1.969(2) . ? 
Zn2 O7 1.979(2) . ? 
Zn2 O10 2.002(2) 1_655 ? 
Zn2 O13 2.035(3) . ? 
Zn2 K2 3.6874(10) 1_465 ? 
Zn2 K1 3.8043(9) 1_465 ? 
K1 O11 2.675(3) 1_744 ? 
K1 O3 2.699(3) 1_645 ? 
K1 O9 2.764(3) 1_745 ? 
K1 O13 2.854(2) 1_645 ? 
K1 O5 2.896(2) 1_655 ? 
K1 K3 3.157(4) . ? 
K1 K3 3.160(6) 2_955 ? 
K1 Zn2 3.8043(9) 1_645 ? 
K1 K2 4.1997(10) . ? 
K2 O8 2.598(3) 1_645 ? 
K2 O1 2.619(2) . ? 
K2 O9 2.757(3) 1_745 ? 
K2 O5 2.765(2) 1_655 ? 
K2 O13 2.973(2) 1_645 ? 
K2 C27 3.370(4) 1_655 ? 
K2 C53 3.451(4) 1_745 ? 
K2 Zn2 3.6874(10) 1_645 ? 
K3 K1 3.160(6) 2_955 ? 
K3 K3 3.511(9) 2_955 ? 
C1 C6 1.384(4) . ? 
C1 C2 1.386(4) . ? 
C1 C7 1.500(4) . ? 
C2 C3 1.399(4) . ? 
C2 H2 0.9300 . ? 
C3 C4 1.401(4) . ? 
C3 C13 1.468(4) . ? 
C4 C5 1.397(4) . ? 
C4 H4 0.9300 . ? 
C5 C6 1.408(4) . ? 
C5 C19 1.480(4) . ? 
C6 H6 0.9300 . ? 
C7 C12 1.397(4) . ? 
C7 C8 1.400(4) . ? 
C8 C9 1.396(4) . ? 
C8 H8 0.9300 . ? 
C9 C10 1.373(4) . ? 
C9 H9 0.9300 . ? 
C10 C11 1.398(4) . ? 
C10 C26 1.501(4) . ? 
C11 C12 1.378(4) . ? 
C11 H11 0.9300 . ? 
C12 H12 0.9300 . ? 
C13 C18 1.385(4) . ? 
C13 C14 1.405(4) . ? 
C14 C15 1.391(4) . ? 
C14 H14 0.9300 . ? 
C15 C16 1.381(4) . ? 
C15 H15 0.9300 . ? 
C16 C17 1.389(4) . ? 
C16 C25 1.497(4) . ? 
C17 C18 1.392(4) . ? 
C17 H17 0.9300 . ? 
C18 H18 0.9300 . ? 
C19 C20 1.389(4) . ? 
C19 C24 1.393(4) . ? 
C20 C21 1.377(4) . ? 
C20 H20 0.9300 . ? 
C21 C22 1.402(4) . ? 
C21 H21 0.9300 . ? 
C22 C23 1.380(4) . ? 
C22 C27 1.498(4) . ? 
C23 C24 1.381(4) . ? 
C23 H23 0.9300 . ? 
C24 H24 0.9300 . ? 
C25 O3 1.239(4) . ? 
C25 O4 1.284(4) . ? 
C26 O1 1.244(4) . ? 
C26 O2 1.274(4) . ? 
C27 O6 1.229(4) . ? 
C27 O5 1.300(4) . ? 
C27 K2 3.370(4) 1_455 ? 
C28 C29 1.376(5) . ? 
C28 C33 1.401(5) . ? 
C28 C34 1.487(4) . ? 
C29 C30 1.395(5) . ? 
C29 H29 0.9300 . ? 
C30 C31 1.402(5) . ? 
C30 C40 1.478(5) . ? 
C31 C32 1.391(4) . ? 
C31 H31 0.9300 . ? 
C32 C33 1.393(5) . ? 
C32 C46 1.479(5) . ? 
C33 H33 0.9300 . ? 
C34 C39 1.391(5) . ? 
C34 C35 1.394(5) . ? 
C35 C36 1.379(4) . ? 
C35 H35 0.9300 . ? 
C36 C37 1.386(5) . ? 
C36 H36 0.9300 . ? 
C37 C38 1.396(5) . ? 
C37 C52 1.502(4) . ? 
C38 C39 1.386(5) . ? 
C38 H38 0.9300 . ? 
C39 H39 0.9300 . ? 
C40 C45 1.392(5) . ? 
C40 C41 1.395(5) . ? 
C41 C42 1.374(5) . ? 
C41 H41 0.9300 . ? 
C42 C43 1.385(5) . ? 
C42 H42 0.9300 . ? 
C43 C44 1.395(5) . ? 
C43 C53 1.482(5) . ? 
C44 C45 1.387(5) . ? 
C44 H44 0.9300 . ? 
C45 H45 0.9300 . ? 
C46 C47 1.392(4) . ? 
C46 C51 1.400(5) . ? 
C47 C48 1.382(5) . ? 
C47 H47 0.9300 . ? 
C48 C49 1.382(5) . ? 
C48 H48 0.9300 . ? 
C49 C50 1.397(5) . ? 
C49 C54 1.506(5) . ? 
C50 C51 1.376(5) . ? 
C50 H50 0.9300 . ? 
C51 H51 0.9300 . ? 
C52 O8 1.236(4) . ? 
C52 O7 1.296(4) . ? 
C53 O9 1.254(5) . ? 
C53 O10 1.267(5) . ? 
C53 K2 3.451(4) 1_365 ? 
C54 O11 1.230(4) . ? 
C54 O12 1.293(4) . ? 
C55 O14 1.242(4) . ? 
C55 O13 1.254(4) . ? 
C55 H55 0.9300 . ? 
O3 K1 2.699(3) 1_465 ? 
O5 Zn1 1.979(2) 1_455 ? 
O5 K2 2.765(2) 1_455 ? 
O5 K1 2.896(2) 1_455 ? 
O8 K2 2.598(3) 1_465 ? 
O9 K2 2.757(3) 1_365 ? 
O9 K1 2.764(3) 1_365 ? 
O10 Zn2 2.002(2) 1_455 ? 
O11 K1 2.675(3) 1_366 ? 
O12 Zn1 1.959(2) 1_366 ? 
O13 K1 2.854(2) 1_465 ? 
O13 K2 2.973(2) 1_465 ? 
O14 Zn1 2.011(3) 1_465 ? 
 
loop_ 
 _geom_angle_atom_site_label_1 
 _geom_angle_atom_site_label_2 
 _geom_angle_atom_site_label_3 
 _geom_angle 
 _geom_angle_site_symmetry_1 
 _geom_angle_site_symmetry_3 
 _geom_angle_publ_flag 
O12 Zn1 O2 104.41(10) 1_744 . ? 
O12 Zn1 O5 113.66(9) 1_744 1_655 ? 
O2 Zn1 O5 124.25(9) . 1_655 ? 
O12 Zn1 O14 104.43(10) 1_744 1_645 ? 
O2 Zn1 O14 89.86(10) . 1_645 ? 
O5 Zn1 O14 116.52(10) 1_655 1_645 ? 
O12 Zn1 K1 95.53(7) 1_744 . ? 
O2 Zn1 K1 159.41(8) . . ? 
O5 Zn1 K1 48.49(6) 1_655 . ? 
O14 Zn1 K1 80.15(7) 1_645 . ? 
O12 Zn1 K2 157.66(7) 1_744 . ? 
O2 Zn1 K2 94.68(7) . . ? 
O5 Zn1 K2 44.40(6) 1_655 . ? 
O14 Zn1 K2 86.85(7) 1_645 . ? 
K1 Zn1 K2 67.021(17) . . ? 
O4 Zn2 O7 100.33(10) . . ? 
O4 Zn2 O10 107.17(11) . 1_655 ? 
O7 Zn2 O10 110.55(11) . 1_655 ? 
O4 Zn2 O13 107.55(10) . . ? 
O7 Zn2 O13 97.42(10) . . ? 
O10 Zn2 O13 129.88(11) 1_655 . ? 
O4 Zn2 K2 159.74(8) . 1_465 ? 
O7 Zn2 K2 90.52(7) . 1_465 ? 
O10 Zn2 K2 84.50(9) 1_655 1_465 ? 
O13 Zn2 K2 53.63(6) . 1_465 ? 
O4 Zn2 K1 93.79(7) . 1_465 ? 
O7 Zn2 K1 144.83(8) . 1_465 ? 
O10 Zn2 K1 95.45(9) 1_655 1_465 ? 
O13 Zn2 K1 47.45(6) . 1_465 ? 
K2 Zn2 K1 68.172(18) 1_465 1_465 ? 
O11 K1 O3 113.82(8) 1_744 1_645 ? 
O11 K1 O9 143.41(8) 1_744 1_745 ? 
O3 K1 O9 75.29(8) 1_645 1_745 ? 
O11 K1 O13 87.36(7) 1_744 1_645 ? 
O3 K1 O13 71.11(7) 1_645 1_645 ? 
O9 K1 O13 61.21(7) 1_745 1_645 ? 
O11 K1 O5 70.43(7) 1_744 1_655 ? 
O3 K1 O5 136.79(7) 1_645 1_655 ? 
O9 K1 O5 79.35(7) 1_745 1_655 ? 
O13 K1 O5 66.08(7) 1_645 1_655 ? 
O11 K1 K3 85.04(13) 1_744 . ? 
O3 K1 K3 73.91(10) 1_645 . ? 
O9 K1 K3 130.46(13) 1_745 . ? 
O13 K1 K3 137.33(9) 1_645 . ? 
O5 K1 K3 146.30(11) 1_655 . ? 
O11 K1 K3 127.21(11) 1_744 2_955 ? 
O3 K1 K3 101.07(11) 1_645 2_955 ? 
O9 K1 K3 81.65(10) 1_745 2_955 ? 
O13 K1 K3 142.85(10) 1_645 2_955 ? 
O5 K1 K3 109.21(9) 1_655 2_955 ? 
K3 K1 K3 67.54(13) . 2_955 ? 
O11 K1 Zn1 47.69(5) 1_744 . ? 
O3 K1 Zn1 119.42(5) 1_645 . ? 
O9 K1 Zn1 96.23(5) 1_745 . ? 
O13 K1 Zn1 53.90(5) 1_645 . ? 
O5 K1 Zn1 30.79(4) 1_655 . ? 
K3 K1 Zn1 132.72(12) . . ? 
K3 K1 Zn1 137.64(9) 2_955 . ? 
O11 K1 Zn2 115.46(6) 1_744 1_645 ? 
O3 K1 Zn2 47.76(5) 1_645 1_645 ? 
O9 K1 Zn2 43.22(6) 1_745 1_645 ? 
O13 K1 Zn2 31.70(5) 1_645 1_645 ? 
O5 K1 Zn2 90.33(5) 1_655 1_645 ? 
K3 K1 Zn2 121.66(8) . 1_645 ? 
K3 K1 Zn2 117.33(10) 2_955 1_645 ? 
Zn1 K1 Zn2 85.209(18) . 1_645 ? 
O11 K1 K2 104.26(6) 1_744 . ? 
O3 K1 K2 101.85(5) 1_645 . ? 
O9 K1 K2 40.41(5) 1_745 . ? 
O13 K1 K2 45.02(5) 1_645 . ? 
O5 K1 K2 40.93(5) 1_655 . ? 
K3 K1 K2 170.69(12) . . ? 
K3 K1 K2 105.82(7) 2_955 . ? 
Zn1 K1 K2 56.581(16) . . ? 
Zn2 K1 K2 54.593(17) 1_645 . ? 
O8 K2 O1 92.14(9) 1_645 . ? 
O8 K2 O9 83.84(9) 1_645 1_745 ? 
O1 K2 O9 137.37(8) . 1_745 ? 
O8 K2 O5 138.77(8) 1_645 1_655 ? 
O1 K2 O5 73.67(7) . 1_655 ? 
O9 K2 O5 81.77(8) 1_745 1_655 ? 
O8 K2 O13 73.24(7) 1_645 1_645 ? 
O1 K2 O13 78.39(7) . 1_645 ? 
O9 K2 O13 59.77(7) 1_745 1_645 ? 
O5 K2 O13 66.11(7) 1_655 1_645 ? 
O8 K2 C27 158.51(8) 1_645 1_655 ? 
O1 K2 C27 74.06(8) . 1_655 ? 
O9 K2 C27 95.13(9) 1_745 1_655 ? 
O5 K2 C27 21.72(7) 1_655 1_655 ? 
O13 K2 C27 87.65(8) 1_645 1_655 ? 
O8 K2 C53 68.89(10) 1_645 1_745 ? 
O1 K2 C53 145.45(9) . 1_745 ? 
O9 K2 C53 19.49(8) 1_745 1_745 ? 
O5 K2 C53 101.26(8) 1_655 1_745 ? 
O13 K2 C53 68.73(7) 1_645 1_745 ? 
C27 K2 C53 113.70(10) 1_655 1_745 ? 
O8 K2 Zn2 49.81(5) 1_645 1_645 ? 
O1 K2 Zn2 102.65(7) . 1_645 ? 
O9 K2 Zn2 44.87(6) 1_745 1_645 ? 
O5 K2 Zn2 94.90(5) 1_655 1_645 ? 
O13 K2 Zn2 33.45(5) 1_645 1_645 ? 
C27 K2 Zn2 116.28(6) 1_655 1_645 ? 
C53 K2 Zn2 43.00(7) 1_745 1_645 ? 
O8 K2 Zn1 115.22(6) 1_645 . ? 
O1 K2 Zn1 47.79(5) . . ? 
O9 K2 Zn1 96.17(6) 1_745 . ? 
O5 K2 Zn1 30.06(4) 1_655 . ? 
O13 K2 Zn1 53.29(5) 1_645 . ? 
C27 K2 Zn1 43.42(5) 1_655 . ? 
C53 K2 Zn1 113.46(6) 1_745 . ? 
Zn2 K2 Zn1 86.734(18) 1_645 . ? 
O8 K2 K1 107.04(6) 1_645 . ? 
O1 K2 K1 102.52(6) . . ? 
O9 K2 K1 40.54(6) 1_745 . ? 
O5 K2 K1 43.31(5) 1_655 . ? 
O13 K2 K1 42.77(4) 1_645 . ? 
C27 K2 K1 61.65(6) 1_655 . ? 
C53 K2 K1 59.48(7) 1_745 . ? 
Zn2 K2 K1 57.235(16) 1_645 . ? 
Zn1 K2 K1 56.398(16) . . ? 
K1 K3 K1 112.46(13) . 2_955 ? 
K1 K3 K3 56.28(11) . 2_955 ? 
K1 K3 K3 56.18(15) 2_955 2_955 ? 
C6 C1 C2 119.8(3) . . ? 
C6 C1 C7 120.2(3) . . ? 
C2 C1 C7 119.7(3) . . ? 
C1 C2 C3 121.6(3) . . ? 
C1 C2 H2 119.2 . . ? 
C3 C2 H2 119.2 . . ? 
C2 C3 C4 117.6(3) . . ? 
C2 C3 C13 121.9(3) . . ? 
C4 C3 C13 120.3(3) . . ? 
C5 C4 C3 122.2(3) . . ? 
C5 C4 H4 118.9 . . ? 
C3 C4 H4 118.9 . . ? 
C4 C5 C6 118.1(3) . . ? 
C4 C5 C19 121.0(3) . . ? 
C6 C5 C19 120.8(3) . . ? 
C1 C6 C5 120.8(3) . . ? 
C1 C6 H6 119.6 . . ? 
C5 C6 H6 119.6 . . ? 
C12 C7 C8 118.3(3) . . ? 
C12 C7 C1 119.9(3) . . ? 
C8 C7 C1 121.6(3) . . ? 
C9 C8 C7 120.1(3) . . ? 
C9 C8 H8 119.9 . . ? 
C7 C8 H8 119.9 . . ? 
C10 C9 C8 121.1(3) . . ? 
C10 C9 H9 119.5 . . ? 
C8 C9 H9 119.5 . . ? 
C9 C10 C11 118.9(3) . . ? 
C9 C10 C26 120.8(3) . . ? 
C11 C10 C26 120.2(3) . . ? 
C12 C11 C10 120.6(3) . . ? 
C12 C11 H11 119.7 . . ? 
C10 C11 H11 119.7 . . ? 
C11 C12 C7 120.9(3) . . ? 
C11 C12 H12 119.5 . . ? 
C7 C12 H12 119.5 . . ? 
C18 C13 C14 118.1(3) . . ? 
C18 C13 C3 120.5(3) . . ? 
C14 C13 C3 121.3(3) . . ? 
C15 C14 C13 120.2(3) . . ? 
C15 C14 H14 119.9 . . ? 
C13 C14 H14 119.9 . . ? 
C16 C15 C14 121.3(3) . . ? 
C16 C15 H15 119.4 . . ? 
C14 C15 H15 119.4 . . ? 
C15 C16 C17 118.5(3) . . ? 
C15 C16 C25 121.1(3) . . ? 
C17 C16 C25 120.4(3) . . ? 
C16 C17 C18 120.8(3) . . ? 
C16 C17 H17 119.6 . . ? 
C18 C17 H17 119.6 . . ? 
C13 C18 C17 121.0(3) . . ? 
C13 C18 H18 119.5 . . ? 
C17 C18 H18 119.5 . . ? 
C20 C19 C24 117.8(3) . . ? 
C20 C19 C5 121.7(3) . . ? 
C24 C19 C5 120.4(3) . . ? 
C21 C20 C19 121.3(3) . . ? 
C21 C20 H20 119.4 . . ? 
C19 C20 H20 119.4 . . ? 
C20 C21 C22 120.7(3) . . ? 
C20 C21 H21 119.6 . . ? 
C22 C21 H21 119.6 . . ? 
C23 C22 C21 117.9(3) . . ? 
C23 C22 C27 120.2(3) . . ? 
C21 C22 C27 121.9(3) . . ? 
C22 C23 C24 121.3(3) . . ? 
C22 C23 H23 119.3 . . ? 
C24 C23 H23 119.3 . . ? 
C23 C24 C19 121.0(3) . . ? 
C23 C24 H24 119.5 . . ? 
C19 C24 H24 119.5 . . ? 
O3 C25 O4 123.4(3) . . ? 
O3 C25 C16 120.2(3) . . ? 
O4 C25 C16 116.4(3) . . ? 
O1 C26 O2 124.1(3) . . ? 
O1 C26 C10 119.1(3) . . ? 
O2 C26 C10 116.8(3) . . ? 
O6 C27 O5 122.7(3) . . ? 
O6 C27 C22 119.9(3) . . ? 
O5 C27 C22 117.3(3) . . ? 
O6 C27 K2 128.4(2) . 1_455 ? 
O5 C27 K2 51.94(15) . 1_455 ? 
C22 C27 K2 87.42(19) . 1_455 ? 
C29 C28 C33 118.6(3) . . ? 
C29 C28 C34 120.5(3) . . ? 
C33 C28 C34 120.6(3) . . ? 
C28 C29 C30 122.2(3) . . ? 
C28 C29 H29 118.9 . . ? 
C30 C29 H29 118.9 . . ? 
C29 C30 C31 117.5(3) . . ? 
C29 C30 C40 121.0(3) . . ? 
C31 C30 C40 121.4(3) . . ? 
C32 C31 C30 122.1(3) . . ? 
C32 C31 H31 118.9 . . ? 
C30 C31 H31 118.9 . . ? 
C31 C32 C33 118.0(3) . . ? 
C31 C32 C46 120.1(3) . . ? 
C33 C32 C46 121.7(3) . . ? 
C32 C33 C28 121.4(3) . . ? 
C32 C33 H33 119.3 . . ? 
C28 C33 H33 119.3 . . ? 
C39 C34 C35 118.1(3) . . ? 
C39 C34 C28 122.0(3) . . ? 
C35 C34 C28 119.8(3) . . ? 
C36 C35 C34 121.3(3) . . ? 
C36 C35 H35 119.4 . . ? 
C34 C35 H35 119.4 . . ? 
C35 C36 C37 120.4(3) . . ? 
C35 C36 H36 119.8 . . ? 
C37 C36 H36 119.8 . . ? 
C36 C37 C38 119.0(3) . . ? 
C36 C37 C52 121.1(3) . . ? 
C38 C37 C52 119.8(3) . . ? 
C39 C38 C37 120.3(4) . . ? 
C39 C38 H38 119.9 . . ? 
C37 C38 H38 119.9 . . ? 
C38 C39 C34 120.9(4) . . ? 
C38 C39 H39 119.5 . . ? 
C34 C39 H39 119.5 . . ? 
C45 C40 C41 118.1(3) . . ? 
C45 C40 C30 120.1(3) . . ? 
C41 C40 C30 121.4(3) . . ? 
C42 C41 C40 121.1(3) . . ? 
C42 C41 H41 119.4 . . ? 
C40 C41 H41 119.4 . . ? 
C41 C42 C43 120.6(3) . . ? 
C41 C42 H42 119.7 . . ? 
C43 C42 H42 119.7 . . ? 
C42 C43 C44 119.1(3) . . ? 
C42 C43 C53 119.7(3) . . ? 
C44 C43 C53 121.2(4) . . ? 
C45 C44 C43 120.0(4) . . ? 
C45 C44 H44 120.0 . . ? 
C43 C44 H44 120.0 . . ? 
C44 C45 C40 121.0(3) . . ? 
C44 C45 H45 119.5 . . ? 
C40 C45 H45 119.5 . . ? 
C47 C46 C51 117.2(3) . . ? 
C47 C46 C32 122.6(3) . . ? 
C51 C46 C32 120.1(3) . . ? 
C48 C47 C46 121.4(3) . . ? 
C48 C47 H47 119.3 . . ? 
C46 C47 H47 119.3 . . ? 
C47 C48 C49 120.6(3) . . ? 
C47 C48 H48 119.7 . . ? 
C49 C48 H48 119.7 . . ? 
C48 C49 C50 119.0(3) . . ? 
C48 C49 C54 122.1(3) . . ? 
C50 C49 C54 118.8(3) . . ? 
C51 C50 C49 119.9(3) . . ? 
C51 C50 H50 120.1 . . ? 
C49 C50 H50 120.1 . . ? 
C50 C51 C46 121.9(3) . . ? 
C50 C51 H51 119.1 . . ? 
C46 C51 H51 119.1 . . ? 
O8 C52 O7 124.2(3) . . ? 
O8 C52 C37 120.4(3) . . ? 
O7 C52 C37 115.4(3) . . ? 
O9 C53 O10 122.7(3) . . ? 
O9 C53 C43 119.4(4) . . ? 
O10 C53 C43 117.9(4) . . ? 
O9 C53 K2 47.20(17) . 1_365 ? 
O10 C53 K2 107.8(2) . 1_365 ? 
C43 C53 K2 112.9(2) . 1_365 ? 
O11 C54 O12 124.5(3) . . ? 
O11 C54 C49 121.2(3) . . ? 
O12 C54 C49 114.3(3) . . ? 
O14 C55 O13 125.6(4) . . ? 
O14 C55 H55 117.2 . . ? 
O13 C55 H55 117.2 . . ? 
C26 O1 K2 160.3(2) . . ? 
C26 O2 Zn1 111.2(2) . . ? 
C25 O3 K1 149.9(2) . 1_465 ? 
C25 O4 Zn2 112.0(2) . . ? 
C27 O5 Zn1 108.20(19) . 1_455 ? 
C27 O5 K2 106.34(18) . 1_455 ? 
Zn1 O5 K2 105.54(8) 1_455 1_455 ? 
C27 O5 K1 136.71(18) . 1_455 ? 
Zn1 O5 K1 100.73(8) 1_455 1_455 ? 
K2 O5 K1 95.76(7) 1_455 1_455 ? 
C52 O7 Zn2 110.8(2) . . ? 
C52 O8 K2 134.7(2) . 1_465 ? 
C53 O9 K2 113.3(2) . 1_365 ? 
C53 O9 K1 144.1(2) . 1_365 ? 
K2 O9 K1 99.05(9) 1_365 1_365 ? 
C53 O10 Zn2 104.6(2) . 1_455 ? 
C54 O11 K1 153.5(2) . 1_366 ? 
C54 O12 Zn1 111.0(2) . 1_366 ? 
C55 O13 Zn2 121.0(2) . . ? 
C55 O13 K1 122.0(2) . 1_465 ? 
Zn2 O13 K1 100.85(8) . 1_465 ? 
C55 O13 K2 120.8(2) . 1_465 ? 
Zn2 O13 K2 92.92(8) . 1_465 ? 
K1 O13 K2 92.21(6) 1_465 1_465 ? 
C55 O14 Zn1 121.9(2) . 1_465 ? 
 
_diffrn_measured_fraction_theta_max    0.999 
_diffrn_reflns_theta_full              25.20 
_diffrn_measured_fraction_theta_full   0.999 
_refine_diff_density_max    1.009 
_refine_diff_density_min   -0.795 
_refine_diff_density_rms    0.079 
